# Supplementary material for: Access to oxytocin and misoprostol for management of postpartum haemorrhage in Kenya, Uganda and Zambia: a cross-sectional assessment of availability, prices and affordability
Source: PubMed Central journal article supplement — BMJ Open. 2021 Jan 7;11(1):e042948. doi: 10.1136/bmjopen-2020-042948 (PMC7797249; doi:10.1136/bmjopen-2020-042948), 2021-01-07
Supplement: bmjopen-2020-042948.draft_revisions.pdf [file bmjopen-2020-042948.draft_revisions.pdf]

# BMJ Open

BMJ Open is committed to open peer review. As part of this commitment we make the peer review history of every article we publish publicly available.

When an article is published we post the peer reviewers' comments and the authors' responses online. We also post the versions of the paper that were used during peer review. These are the versions that the peer review comments apply to.

The versions of the paper that follow are the versions that were submitted during the peer review process. They are not the versions of record or the final published versions. They should not be cited or distributed as the published version of this manuscript.

BMJ Open is an open access journal and the full, final, typeset and author-corrected version of record of the manuscript is available on our site with no access controls, subscription charges or pay-per-view fees (<http://bmjopen.bmj.com>).

If you have any questions on BMJ Open's open peer review process please email [info.bmjopen@bmj.com](mailto:info.bmjopen@bmj.com)

# BMJ Open

**Access to oxytocin and misoprostol for management of post-partum haemorrhage in Kenya, Uganda and Zambia: a comparison of availability, prices and affordability.**

|                               |                                                                                                                                                                                                                                                                                                                                                                                                                                                                                                                                                                                                                                                                                                                                                                                                                                                                                |
|-------------------------------|--------------------------------------------------------------------------------------------------------------------------------------------------------------------------------------------------------------------------------------------------------------------------------------------------------------------------------------------------------------------------------------------------------------------------------------------------------------------------------------------------------------------------------------------------------------------------------------------------------------------------------------------------------------------------------------------------------------------------------------------------------------------------------------------------------------------------------------------------------------------------------|
| Journal:                      | <i>BMJ Open</i>                                                                                                                                                                                                                                                                                                                                                                                                                                                                                                                                                                                                                                                                                                                                                                                                                                                                |
| Manuscript ID                 | bmjopen-2020-042948                                                                                                                                                                                                                                                                                                                                                                                                                                                                                                                                                                                                                                                                                                                                                                                                                                                            |
| Article Type:                 | Original research                                                                                                                                                                                                                                                                                                                                                                                                                                                                                                                                                                                                                                                                                                                                                                                                                                                              |
| Date Submitted by the Author: | 21-Jul-2020                                                                                                                                                                                                                                                                                                                                                                                                                                                                                                                                                                                                                                                                                                                                                                                                                                                                    |
| Complete List of Authors:     | <p>Kibira, Denis; Coalition for Health Promotion and Social Development (HEPS-Uganda), ; Utrecht University, WHO Collaborating Centre for Pharmaceutical Policy and Regulation, Division of Pharmacoepidemiology and Clinical Pharmacology</p> <p>Ooms , Gaby; Health Action International</p> <p>van den Ham, Hendrika; Utrecht University Utrecht Institute for Pharmaceutical Sciences, WHO Collaborating Centre for Pharmaceutical Policy and Regulation, Division of Pharmacoepidemiology and Clinical Pharmacology</p> <p>Namugambe-Kitutu, Juliet ; Mbarara University of Science and Technology, Department of Pharmacy</p> <p>Reed, Tim; Health Action International</p> <p>Leufkens, Hubert; Utrecht University, Utrecht Institute for Pharmaceutical Sciences</p> <p>Mantel-Teeuwisse, Aukje; Utrecht University, Utrecht Institute for Pharmaceutical Sciences</p> |
| Keywords:                     | Health policy < HEALTH SERVICES ADMINISTRATION & MANAGEMENT, Maternal medicine < OBSTETRICS, REPRODUCTIVE MEDICINE                                                                                                                                                                                                                                                                                                                                                                                                                                                                                                                                                                                                                                                                                                                                                             |
|                               |                                                                                                                                                                                                                                                                                                                                                                                                                                                                                                                                                                                                                                                                                                                                                                                                                                                                                |

SCHOLARONE™  
Manuscripts

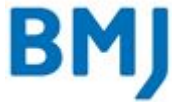

I, the Submitting Author has the right to grant and does grant on behalf of all authors of the Work (as defined in the below author licence), an exclusive licence and/or a non-exclusive licence for contributions from authors who are: i) UK Crown employees; ii) where BMJ has agreed a CC-BY licence shall apply, and/or iii) in accordance with the terms applicable for US Federal Government officers or employees acting as part of their official duties; on a worldwide, perpetual, irrevocable, royalty-free basis to BMJ Publishing Group Ltd ("BMJ") its licensees and where the relevant Journal is co-owned by BMJ to the co-owners of the Journal, to publish the Work in this journal and any other BMJ products and to exploit all rights, as set out in our [licence](#).

The Submitting Author accepts and understands that any supply made under these terms is made by BMJ to the Submitting Author unless you are acting as an employee on behalf of your employer or a postgraduate student of an affiliated institution which is paying any applicable article publishing charge ("APC") for Open Access articles. Where the Submitting Author wishes to make the Work available on an Open Access basis (and intends to pay the relevant APC), the terms of reuse of such Open Access shall be governed by a Creative Commons licence – details of these licences and which [Creative Commons](#) licence will apply to this Work are set out in our licence referred to above.

Other than as permitted in any relevant BMJ Author's Self Archiving Policies, I confirm this Work has not been accepted for publication elsewhere, is not being considered for publication elsewhere and does not duplicate material already published. I confirm all authors consent to publication of this Work and authorise the granting of this licence.

1  
2  
3  
4 1 **Access to oxytocin and misoprostol for management of post-partum haemorrhage in Kenya,**  
5 2 **Uganda and Zambia: a comparison of availability, prices and affordability.**

6  
7 3 **Authors**

8 4 Denis Kibira<sup>1,2</sup>, Gaby Isabelle Ooms<sup>1,3</sup>, Hendrika A. van den Ham<sup>1</sup>, Juliet Sanyu Namugambe-Kitutu<sup>4</sup>, Tim  
9 5 Reed<sup>3</sup>, Hubert G. Leufkens<sup>1</sup>, Aukje K. Mantel-Teeuwisse<sup>1</sup>

10  
11  
12 7 **Affiliations**

13 8 <sup>1</sup> WHO Collaborating Centre for Pharmaceutical Policy and Regulation  
14 9 Utrecht University

15 10 Utrecht Institute for Pharmaceutical Sciences  
16 11 Universiteitsweg 99  
17 12 3584 CG Utrecht, the Netherlands

18 13 <sup>2</sup> Coalition for Health Promotion and Social Development (HEPS-Uganda)  
19 14 Plot 351A, Balintuma Road, Namirembe Hill

20 15 <sup>3</sup> Health Action International  
21 16 Overtoom 60 (2)

22 17 1054 HK Amsterdam, The Netherlands

23 18 <sup>4</sup> Department of Pharmacy, Mbarara University of Science and Technology  
24 19 Mbarara, Uganda

25  
26  
27  
28 21 **Authors email list**

29 22 DK: [dkibira@gmail.com/dkibira@heps.or.ug](mailto:dkibira@gmail.com/dkibira@heps.or.ug)

30 23 GIO: [Gaby@haiweb.org](mailto:Gaby@haiweb.org)

31 24 HDH: [H.A.vandenHam@uu.nl](mailto:H.A.vandenHam@uu.nl)

32 25 JN: [julietsanyu@gmail.com](mailto:julietsanyu@gmail.com)

33 26 TR: [Tim@haiweb.org](mailto:Tim@haiweb.org)

34 27 HL: [H.G.M.Leufkens@uu.nl](mailto:H.G.M.Leufkens@uu.nl)

35 28 AM: [a.k.mantel@uu.nl](mailto:a.k.mantel@uu.nl)

36  
37  
38 30 **Corresponding author**

39 31 Denis Kibira, MBA

40 32 WHO Collaborating Centre for Pharmaceutical Policy and Regulation

41 33 Utrecht University

42 34 Utrecht Institute for Pharmaceutical Sciences

43 35 Universiteitsweg 99

44 36 3584 CG Utrecht, the Netherlands

45 37 Coalition for Health Promotion and Social Development (HEPS-Uganda)

46 38 Plot 351A, Balintuma Road, Namirembe Hill, Kampala, Uganda

47 39 Email: [dkibira@gmail.com/dkibira@heps.or.ug](mailto:dkibira@gmail.com/dkibira@heps.or.ug)

48 40 Tel: +256701580120

49 41 Abstract word count: 291

50 42 Manuscript word count (excluding tables, figures and references): 3268

51 43 Number of tables and figures: 4

52  
53  
54 45 **Key words:** Access, Oxytocin, Misoprostol, Post-partum haemorrhage

**Abstract****Objectives**

This paper assesses access to oxytocin and misoprostol at health facilities to improve prevention and management of postpartum haemorrhage by measuring the availability, prices and affordability of the medicines in Kenya, Uganda and Zambia.

**Design**

The assessment used a cross-sectional design adapted from the standardized WHO/HAI methodology on measuring availability, prices and affordability to medicines.

**Setting**

Data were collected in July and August 2017 from 376 health facilities from a target of 432 facilities across the three countries.

**Participants**

Health facility managers.

**Primary and secondary outcome measures**

Availability was calculated as the mean percentage of sampled medicine outlets where the medicine was found on the day of data collection. Medicine prices were compared to international reference prices (IRP) and expressed as median price ratios (MPRs). Affordability was calculated using the number of days required to pay for a standard treatment based on the daily income of the lowest-paid government worker.

**Results**

Availability of either oxytocin or misoprostol at health facilities was high; 81% in Kenya, 82% in Uganda, and 76% in Zambia. Oxytocin was more available than misoprostol, and it was most available in the public sector in the three countries. Availability of misoprostol was highest in the public sector in Uganda (88%). Oxytocin and misoprostol were purchased by patients at prices above IRP, but both medicines cost less than a day's wages and were therefore affordable. Availability of misoprostol was poor in rural settings where it would be more preferred due to lack of trained personnel and cold storage facilities required for oxytocin.

**Conclusion**

1  
2  
3 74 Availability and affordability of either oxytocin or misoprostol at health facilities was optimal.  
4  
5 75 However, countries with limited resources should explore mechanisms to optimize  
6  
7 76 management of PPH by improving access to misoprostol especially in rural areas.  
8  
9 77

### 10 78 **Strengths and limitations of the study**

- 12 79 • The WHO/HAI methodology that was used for this study is tested, reliable, standardized  
13 80 and validated for the measurement of medicine prices and availability.
- 14 81 • The study provides details on availability, price, and affordability of individual medicines  
15 82 across three sectors (public, private and mission).
- 16 83 • The methodology uses a cross-sectional design and therefore historical data trends were  
17 84 not traced.
- 18 85 • The study only used two frontline medicines for PPH, while countries may have had  
19 86 other alternative therapies including carbetocin which were not captured.
- 20 87 • Findings presented here may not be used to predict country pharmaceutical supply  
21 88 chain but are intended to stimulate policy discussions on deliberate targeting and the  
22 89 use of available technologies to improve access.

## 91 **Background**

92 The risk of women dying due to pregnancy and childbirth remains a major global health  
93 challenge. In 2017 there were approximately 295,000 maternal deaths globally, of which 94%  
94 occurred in low-and middle-income countries (LMICs). Sub-Saharan Africa contributed about  
95 66% to these deaths [1]. The global leading cause of maternal mortality is haemorrhage,  
96 accounting for 27% of all maternal deaths [2].

97 Postpartum haemorrhage (PPH) which occurs after childbirth accounts for most (72%) of the  
98 three forms of haemorrhage. Antepartum haemorrhage which occurs during pregnancy  
99 accounts for 24% while intrapartum haemorrhage (during childbirth) accounts for three percent  
100 [2]. PPH is responsible for 34% of maternal deaths in Kenya, 25% in Uganda and 34% in Zambia  
101 [3-5].

102 The World Health Organization (WHO) recommends oxytocin as the medicine of choice for  
103 management of PPH, and misoprostol as the second line alternative when injection capability is  
104 lacking and/or storage conditions for oxytocin are not met. Other uterotonics such as  
105 ergometrine and carbetocin are also recommended when use of oxytocin is not feasible [1].

106 The relevance of oxytocin and misoprostol to health systems was further emphasised by the  
107 United Nations Commission on Life-saving Commodities for women and children when they  
108 were listed among the 13 lifesaving, low-cost medicines with greatest proven potential to avert  
109 preventable deaths [6]. Both oxytocin and misoprostol are included in national essential  
110 medicine lists in Kenya, Uganda and Zambia [7-9].

111  
112 The quality, efficacy and safety of oxytocin and misoprostol have been widely studied [11-24].  
113 Oxytocin is temperature sensitive and should therefore be stored under refrigeration at  
114 temperatures between 2 and 8°C to prevent degradation expected at higher temperatures [11].  
115 Degradation reduces potency and consequently the effectiveness of the medicine. Oxytocin  
116 stability through the supply chain has proven a worry to policy makers and has been a subject

1  
2  
3 117 of numerous investigations to ascertain quality and efficacy [12-14]. Some studies on the  
4  
5 118 quality of oxytocin found analyzed samples to contain less active pharmaceutical ingredients  
6  
7 119 than was claimed on label, while some samples also failed sterility tests [15-17]. LMICs with low  
8  
9 120 resources may also lack facilities required for adequate storage conditions for oxytocin to  
10  
11 121 ensure integrity of the product, while they may also lack trained health workers for its  
12  
13 122 administration [18]. Women living among displaced populations, in conflict areas, hard to reach  
14  
15 123 areas, who deliver at home or with a traditional birth attendant seldom have access to a trained  
16  
17 124 health worker. Hence, they do not have access to oxytocin or if they do, it is not safely used  
18  
19 125 [10]. As a result of these challenges, prevention and treatment of PPH in low-resource settings  
20  
21 126 using oxytocin has not provided the desired impact [19, 20].  
22

23  
24 128 Misoprostol, a prostaglandin, is an alternative to oxytocin in the management of PPH. It is  
25  
26 129 cheap, stable at room temperature and more convenient to administer. It can be administered  
27  
28 130 sublingually, orally and vaginally [20, 21, 25, 26]. It has been demonstrated through various  
29  
30 131 studies that use of misoprostol is feasible, improves uterotonic coverage, reduces incidence of  
31  
32 132 PPH and that it is effective for use at community and household level in low-resource settings  
33  
34 133 [21-23].

35  
36 134 In 2015, the WHO expert committee on the selection and use of medicines recommended the  
37  
38 135 addition of misoprostol for the prevention and treatment of postpartum haemorrhage when  
39  
40 136 oxytocin is not available or cannot be used safely [24]. At different occasions the inclusion of  
41  
42 137 misoprostol in the list of WHO recommended medicines was debated for both efficacy and  
43  
44 138 safety reasons, but the 2015 decision to recommend misoprostol in addition to oxytocin for  
45  
46 139 prevention of PPH was reaffirmed in 2019 by a WHO expert committee [27]. Before 2015  
47  
48 140 misoprostol was indicated by WHO for use in induction of labour and management of  
49  
50 141 spontaneous and induced abortion [28]. The historical use of misoprostol for termination of  
51  
52 142 pregnancies may have affected its acceptability for routine use in prevention of PPH, despite  
53  
54 143 available convincing evidence of its therapeutic effect and relative safety in management of  
55  
56 144 PPH. Another challenge is that the high doses of misoprostol required for post-partum  
57  
58 145 haemorrhage often result in troublesome side effects such as vomiting and shivering [29].



1  
2  
3 146 Further, the longer half-life of the medicine means that it stays longer in the body and has  
4  
5 147 potential to cause complications [30].  
6  
7

8 148  
9  
10 149 These two medicines could be used complementarily to overcome challenges and barriers in  
11  
12 150 policy, health sector infrastructure and health service delivery that at the moment inhibit the  
13  
14 151 optimal management of PPH [10, 31]. However, there is a knowledge gap on the accessibility of  
15  
16 152 both medicines in low-resource settings. This is a missed opportunity in closing the gap in the  
17  
18 153 reduction of maternal mortality in developing countries. This paper therefore assesses access to  
19  
20 154 oxytocin and misoprostol in urban and rural health facilities in Kenya, Uganda and Zambia  
21  
22 155 through a comparison of availability, prices and affordability of the two medicines to facilitate  
23  
24 156 the optimal management of PPH.  
25  
26  
27

157

## 28 158 **Methods**

29  
30  
31 159 An assessment of availability and prices of oxytocin and misoprostol was undertaken using data  
32  
33 160 from Health Action International (HAI) research on sexual and reproductive health commodities  
34  
35 161 (*SRHC: Measuring Prices, Availability & Affordability* [32]). The data was collected in Kenya,  
36  
37 162 Uganda and Zambia in July and August 2017 using a cross-sectional design with quantitative  
38  
39 163 methods adapted from the standardized WHO/HAI methodology [33], which has been validated  
40  
41 164 [34] and used extensively in several countries [35-37].  
42  
43

165

### 44 166 *Patient and Public Involvement*

45  
46  
47 167 The research agenda for this study was set by the multi-stakeholder platform Medicines  
48  
49 168 Transparency Alliance (MeTA) Councils in Kenya, Uganda and Zambia. The study protocols were  
50  
51 169 reviewed and approved by MeTA Councils. Data collectors were selected from the membership  
52  
53 170 of MeTA within the countries. Results were validated by stakeholders including civil society.  
54  
55 171 Dissemination plans were made by MeTA councils and results were disseminated to wide  
56  
57  
58  
59  
60

1  
2  
3 172 country and inter-country platforms including Ministries of Health, Parliamentarians, private  
4  
5 173 sector as well as civil society members to inform policy.  
6  
7

8 174

9  
10  
11 175 *Data collection*

12 176 For this study, the data on availability, price and affordability of the highest and lowest-priced  
13  
14 177 products of oxytocin 10IU, 1ml injections and misoprostol 200 µg tablets were extracted.  
15

16 178 In each of the three countries, six geographical areas (districts, municipalities or counties) were  
17  
18 179 selected; the country's main urban centre and five other areas which were randomly selected.

19  
20 180 All survey areas were reachable within one day's travel from the country's main urban centre  
21  
22 181 using a car or bus. Each survey area covered a population of between 100 000 and 250 000  
23  
24 182 people.

25 183 In each survey area, the main public hospital was selected first. Then, eight public health  
26  
27 184 facilities, four each from urban and rural areas, representing levels of care at which SRHCs  
28  
29 185 should be made available, were randomly selected [38]. Additionally, eight private (for profit)  
30  
31 186 and eight mission sector (not for profit) health facilities (four each from urban and rural areas)  
32  
33 187 that were within a three-hour drive radius of the main hospitals were selected. Thus, a total of  
34  
35 188 24 health facilities were sampled from each of the six survey areas in Kenya, Uganda and  
36  
37 189 Zambia, respectively, giving a total of 144 facilities per country. The final sample per country  
38  
39 190 ensured a minimum representation of 30 health facilities from the public, mission and private  
40  
41 191 sectors [33].  
42

43  
44 193 Eight data collectors with experience of conducting medicine surveys worked in pairs of a  
45  
46 194 pharmacist and a social scientist under close supervision of a qualified survey manager. Prior to  
47  
48 195 data collection, the team was trained on the methodology. Data collectors used a semi-  
49  
50 196 structured questionnaire administered to facility managers while physically ascertaining the  
51  
52 197 availability of surveyed medicines. Availability was measured by the physical presence of a  
53  
54 198 product in the outlet at the time of the survey. For each medicine surveyed, data collectors  
55  
56 199 recorded the product name for both the highest and lowest-priced medicines available, the  
57  
58  
59  
60

1  
2  
3 200 manufacturer and unit price of the product. In the public sector in Uganda and Zambia where  
4  
5 201 medicines are free of charge to care seekers, prices were not recorded.

6  
7 202  
8  
9 203 Once data collection was complete, survey data was entered into a pre-programmed Microsoft  
10  
11 204 Excel Workbook provided as part of the modified methodology. Data input was independently  
12  
13 205 checked for errors. Additional quality control measures were executed at various stages  
14  
15 206 throughout the study by a survey manager. The survey tools were pre-tested in Uganda in 2016  
16  
17 207 and a field test was conducted by all data collectors prior to data collection. Each data  
18  
19 208 collection team had a supervisor who cross checked the data on a daily basis for completeness,  
20  
21 209 legibility and consistency and reported to the survey manager. Prior to data entry all relayed  
22  
23 210 data was checked for completeness and consistency.

24 211  
25  
26 212 *Data analysis*  
27  
28  
29 213 The availability of oxytocin and misoprostol was calculated as the percentage of sampled  
30  
31 214 medicine outlets where the medicine was found. Availability was also calculated for the  
32  
33 215 presence of either oxytocin or misoprostol at a facility. Data were reported in aggregate as  
34  
35 216 public, private or mission sector medicine outlets. Overall availability per sector was calculated  
36  
37 217 as mean of the two medicines surveyed.

38  
39 218  
40  
41  
42 219 Patient prices were collected in local currency including Shillings in Uganda and Kenya, and  
43  
44 220 Kwacha in Zambia. The mean, minimum and maximum unit prices were calculated. To facilitate  
45  
46 221 cross-country comparisons, medicine prices obtained during the survey were expressed as  
47  
48 222 ratios relative to a standard set of international reference prices by dividing the mean unit  
49  
50 223 price (in dollars) by the Management Sciences for Health international buyers' reference unit  
51  
52 224 price derived on September 25<sup>th</sup> 2018 [39]. Mean price ratios (MPRs) were calculated only for  
53  
54 225 oxytocin and misoprostol products that had price data from at least four medicine outlets. The  
55  
56 226 exchange rate used to calculate MPRs was 1 USD = 102.67 Kenya Shillings (KES), 1 USD = 3667.9

227 Uganda Shillings (UGX), 1 USD = 8.85 Zambia Kwacha (ZMW) taken on 1<sup>st</sup> July, 2017 prior to the  
228 first day of data collection [40, 41].

229  
230 Affordability was calculated using the number of days' wages it requires to pay for standard  
231 treatment or dose of treatment based on the daily income of the lowest-paid government  
232 worker (LPGW) [33]. The daily wage of a LPGW is approximately KES 411 (USD 4) in Kenya, 6255  
233 UGX (USD 1.78) in Uganda, and ZMW 96.7 (USD 10.92) in Zambia, as per public service salary  
234 structures [42]. Treatments that required more than one day's wages to purchase were  
235 considered unaffordable [33].

236

## 237 Results

238 A total of 376 health facilities, including 120, 124 and 132 health facilities in Kenya, Uganda and  
239 Zambia, respectively, were surveyed as shown in table 1.

240 **Table 1: Number of facilities surveyed**

|               | Urban     | Rural     | Total      |
|---------------|-----------|-----------|------------|
| <b>Kenya</b>  |           |           |            |
| Public        | 22        | 22        | 44         |
| Private       | 22        | 20        | 42         |
| Mission       | 19        | 15        | 34         |
| <b>Total</b>  | <b>63</b> | <b>57</b> | <b>120</b> |
| <b>Uganda</b> |           |           |            |
| Public        | 20        | 22        | 42         |
| Private       | 22        | 20        | 42         |
| Mission       | 20        | 20        | 40         |
| <b>Total</b>  | <b>62</b> | <b>62</b> | <b>124</b> |
| <b>Zambia</b> |           |           |            |
| Public        | 30        | 42        | 72         |
| Private       | 32        | 5         | 37         |
| Mission       | 6         | 17        | 23         |
| <b>Total</b>  | <b>68</b> | <b>64</b> | <b>132</b> |

241

### 242 *Availability across sectors*

243 Figure 1 shows the availability of either oxytocin or misoprostol at the surveyed health facilities  
244 in the three countries. Overall availability of either oxytocin or misoprostol met the WHO  
245 benchmark of 80% in Kenya (81%) and Uganda (82%) but was marginally lower in Zambia (76%).  
246 Availability of oxytocin was higher than misoprostol except in Uganda. Availability of either  
247 oxytocin or misoprostol was comparable between the public and mission sectors.

248

249 In the public sector, the three countries met the WHO benchmark for availability of oxytocin.  
250 Misoprostol was only optimally available in the public sector in Uganda (88%), with availability  
251 in Kenya and Zambia lower (36% and 21%, respectively). In the private sector, none of the  
252 countries met the WHO recommended availability for misoprostol. Availability in Zambia was  
253 especially low (24%).

254

### 255 *Availability in urban versus rural areas*

256 Figure 2 shows availability in urban versus rural areas. Oxytocin was available in over 80% of all  
257 public urban and rural facilities across the three countries. Optimum availability of 80% was  
258 further achieved for oxytocin in Kenya mission urban facilities (89%) and in Zambia's mission  
259 sector for both urban and rural facilities (83% and 94%, respectively). Optimum availability of  
260 misoprostol was only achieved in Ugandan public urban and rural facilities (90% and 86%,  
261 respectively).

262

263 In Kenya, oxytocin had a higher availability than misoprostol across all urban and rural facilities  
264 in the three sectors. Availability of misoprostol was lowest in the public sector: availability in

265 urban facilities was 45%, and 27% in rural facilities. In the private sector, there was a higher  
266 availability in rural facilities than in urban facilities for both oxytocin and misoprostol.

267 In Uganda, the public sector was optimally stocked with both oxytocin and misoprostol across  
268 urban and rural facilities. Rural public facilities had a higher availability of oxytocin than urban  
269 public facilities. In the private sector, rural facilities also had a higher availability of oxytocin and  
270 misoprostol compared to urban facilities.

271  
272 Oxytocin had a high availability in Zambia's public and mission sectors across both urban and  
273 rural facilities. Availability in the private sector was very low. Availability of misoprostol was low  
274 across the sectors and areas, with highest availability found in urban mission facilities (50%).  
275 Although both oxytocin and misoprostol were poorly available in the private sector, oxytocin  
276 was more available in rural than urban facilities, while misoprostol had a higher availability in  
277 urban facilities than in rural facilities.

278

### 279 *Prices and affordability*

280 Oxytocin and misoprostol were free for patients in the public and mission sectors in Zambia,  
281 and in the public sector in Uganda. In Kenya's public sector, the lowest price was noted for  
282 oxytocin, with a median price ratio (MPR) of USD 0.174 (Table 2). Both misoprostol and  
283 oxytocin cost less than a day's wages for a LPGW across all countries and sectors, and can  
284 therefore be considered affordable.

285

286 Notwithstanding the sectors in which the medicines were for free, the MPRs for oxytocin and  
287 misoprostol were above one in the countries, ranging from 1.37 for misoprostol in Kenya's  
288 public sector to 29.95 for misoprostol in the private sector in Zambia. This meant that both

1  
2  
3  
4  
5  
6  
7  
8  
9  
10  
11  
12  
13  
14  
15  
16  
17  
18  
19  
20  
21  
22  
23  
24  
25  
26  
27  
28  
29  
30  
31  
32  
33  
34  
35  
36  
37  
38  
39  
40  
41  
42  
43  
44  
45  
46  
47  
48  
49  
50  
51  
52  
53  
54  
55  
56  
57  
58  
59  
60

289 misoprostol and oxytocin were accessed by patients at prices that were more expensive  
290 compared to international reference prices.

For peer review only

**Table 2: Prices and affordability of misoprostol and oxytocin across countries**

|               |             | Public      |                  |                                                    | Private     |                   |                                                    | Mission     |                  |                                                    |
|---------------|-------------|-------------|------------------|----------------------------------------------------|-------------|-------------------|----------------------------------------------------|-------------|------------------|----------------------------------------------------|
|               |             | Price (USD) | Mean Price Ratio | Affordability of treatment (number of day's wages) | Price (USD) | Mean Price Ratio* | Affordability of treatment (number of day's wages) | Price (USD) | Mean Price Ratio | Affordability of treatment (number of day's wages) |
| <b>Kenya</b>  | Oxytocin    | 0.029       | 0.17             | 0.01                                               | 1.354       | 8.14              | 0.34                                               | 0.672       | 4.04             | 0.30                                               |
|               | Misoprostol | 0.273       | 1.37             | 0.07                                               | 1.967       | 9.84              | 0.49                                               | 1.217       | 6.09             | 0.17                                               |
|               |             |             |                  |                                                    |             |                   |                                                    |             |                  |                                                    |
| <b>Uganda</b> | Oxytocin    | 0           | NA               | NA                                                 | 0.998       | 5.99              | 0.57                                               | 0.408       | 2.45             | 0.23                                               |
|               | Misoprostol | 0           | NA               | NA                                                 | 0.589       | 2.95              | 0.34                                               | 0.39        | 1.95             | 0.22                                               |
|               |             |             |                  |                                                    |             |                   |                                                    |             |                  |                                                    |
| <b>Zambia</b> | Oxytocin    | 0           | NA               | NA                                                 | 0.678       | 4.08              | 0.06                                               | NA          | NA               | NA                                                 |
|               | Misoprostol | 0           | NA               | NA                                                 | 5.989       | 29.95             | 0.55                                               | NA          | NA               | NA                                                 |

NA=not applicable, USD=United States Dollar



1  
2  
3  
4 291 **Discussion**

5 292 This paper assesses access to oxytocin and misoprostol in urban and rural health facilities in  
6  
7 293 Kenya, Uganda and Zambia through a comparison of availability, prices and affordability of the  
8  
9 294 two medicines to facilitate the optimal management of PPH.  
10

11 295

12 296 Overall, availability of uterotonics, expressed as the presence of either oxytocin or misoprostol,  
13  
14 297 was high in Kenya and Uganda, and just below the WHO benchmark of 80% in Zambia.  
15  
16 298 Misoprostol was markedly less available than oxytocin. Oxytocin and misoprostol were  
17  
18 299 accessed by patients in the private sector at prices that were more expensive than the  
19  
20 300 international reference prices. However, both medicines cost less than a day's wages, which is  
21  
22 301 considered affordable. The availability of misoprostol across urban and rural areas did not show  
23  
24 302 the expected pattern of having a higher availability of the medicine in rural areas, which are  
25  
26 303 more prone to health system barriers for use of oxytocin.  
27

28 304

29 305 Oxytocin availability was high in the public and mission sectors but lower in the private sector,  
30  
31 306 particularly in Zambia. In the private sector, none of the countries met the WHO availability  
32  
33 307 benchmark of 80% for the two medicines. Besides the public sector in Uganda, misoprostol was  
34  
35 308 not optimally available in the other countries or sectors. Misoprostol had a low availability,  
36  
37 309 particularly in rural areas where the medicine ought to play a major role given that facilities in  
38  
39 310 these areas tend to lack adequately trained health workers and the health infrastructure  
40  
41 311 required to maintain cold chain to safeguard the quality of oxytocin [18]. Its poor availability in  
42  
43 312 Kenya and Zambia may be a result of slow diffusion of the intervention into the health system  
44  
45 313 [43, 44]. Moreover, misoprostol has been recommended by WHO for use in PPH since 2015  
46  
47 314 after several rounds of weighing the benefits and risks, but the debate about its role in PPH  
48  
49 315 prevention has continued over the years [24] [27]. The fear and stigma amongst health workers  
50  
51 316 about the use of misoprostol to induce abortions may also have contributed to the situation  
52  
53 317 [29]. In contrast, Uganda's efforts as an early adaptor [43, 44] to ensure availability of  
54  
55 318 misoprostol through government procurement and community level distribution strategies may  
56  
57  
58  
59  
60

1  
2  
3 319 explain why it has a higher availability of misoprostol, as well as lower PPH levels compared to  
4  
5 320 Kenya and Zambia (25% in Uganda versus 34% in both Kenya and Zambia) [3-5].  
6

7 321  
8  
9 322 Urban facilities have better health infrastructure such as cold chain facilities, and also tend to  
10  
11 323 have more health workers compared to rural facilities [45-47]. It would therefore be expected  
12  
13 324 that these urban areas would have a higher availability of oxytocin and lower availability of  
14  
15 325 misoprostol than rural facilities. However, there were instances when rural facilities had a  
16  
17 326 higher availability of oxytocin and a lower availability of misoprostol. This may indicate that  
18  
19 327 stocking of oxytocin and misoprostol by health facilities does not take into consideration  
20  
21 328 challenges faced by the facilities to administer the medicines. It will require policy makers to  
22  
23 329 look into how to address context-specific barriers related to these medicines by ensuring that  
24  
25 330 they are deployed where they can have maximum impact [48, 49]. For example, efforts should  
26  
27 331 be made to deploy more misoprostol in rural areas where there is a lack of adequately trained  
28  
29 332 personnel and a lack of health infrastructure to properly use oxytocin, and to ensure that both  
30  
31 333 medicines are available to complement one another depending on circumstances.  
32

33 334  
34 335 PPH levels across the countries are high despite health facilities having reached the WHO  
35  
36 336 benchmark for availability of either oxytocin or misoprostol across the three countries. This  
37  
38 337 may confirm the finding from a study by Ononge et al that despite use of uterotonics, incidence  
39  
40 338 of PPH remains high [5]. It may be that some oxytocin found at health facilities may not have  
41  
42 339 the quality and efficacy for optimum management of PPH [15-17]. Countries should strive for  
43  
44 340 universal access as the 80% availability benchmark by WHO still leaves one in five facilities  
45  
46 341 without required medicine. However, availability of a medicine alone does not guarantee that it  
47  
48 342 is used, health worker beliefs and knowledge as well as necessary infrastructure such as  
49  
50 343 electricity and equipment are needed to reduce PPH levels.  
51

52 344  
53 345 Studies have shown that combinations of uterotonics have proven to be more effective. For  
54  
55 346 example, a misoprostol plus oxytocin combination was found to be more effective in preventing  
56  
57 347 PPH than the currently used standard of oxytocin only [50]. This argument further emphasizes  
58  
59  
60

1  
2  
3 348 that having both oxytocin and misoprostol available at the health facility could help to improve  
4  
5 349 PPH management.  
6  
7

8 350 Although oxytocin and misoprostol were affordable to patients, the private sector prices were  
9  
10 351 varied and more expensive compared to IRPs. For example, the MPR of misoprostol ranged  
11  
12 352 from 1.37 in Kenya to 29.95 in Zambia. This suggests that countries need to explore pricing  
13  
14 353 policies to improve affordability of the medicines.  
15

16 354  
17 355 The WHO/HAI methodology that was used for this study is tested, reliable, standardized and  
18  
19 356 validated for the measurement of medicine prices and availability [34]. The study provides  
20  
21 357 details on availability, price, and affordability of individual medicines across three sectors  
22  
23 358 (public, private and mission). The methodology uses a cross-sectional design and therefore  
24  
25 359 historical data trends were not traced. The study only used two frontline medicines for PPH,  
26  
27 360 while countries may have had other alternative therapies including carbetocin which were not  
28  
29 361 captured. Findings presented here may not be used to predict country pharmaceutical supply  
30  
31 362 chain but are intended to stimulate policy discussions on deliberate targeting and the use of  
32  
33 363 available technologies to improve access.  
34

35 364

### 36 365 **Conclusion**

37 366 Oxytocin and misoprostol had optimal availability in Kenya and Uganda, and was just below the  
38  
39 367 WHO benchmark in Zambia. In general, oxytocin was more available than misoprostol. Oxytocin  
40  
41 368 and misoprostol were purchased by patients at prices above international reference prices but  
42  
43 369 both medicines cost less than a day's wages for a LPGW and were therefore considered  
44  
45 370 affordable. However, there was no strategy in place that looked at which medicine could be  
46  
47 371 best utilized in which area. Countries with limited resources should explore mechanisms to  
48  
49 372 balance access to both oxytocin and misoprostol between rural and urban areas to optimize  
50  
51 373 management of PPH.  
52

53 374

54 375  
55  
56  
57  
58  
59  
60

1  
2  
3 376 **List of abbreviations**  
4

5 377 Post-partum haemorrhage (PPH); Median price ratio (MPR); Low- and middle-income countries  
6  
7 378 (LMICs); Lowest-paid government worker (LPGW); sexual and reproductive health commodities  
8  
9 379 (SRHC); Health Action International (HAI); World Health Organisation (WHO).  
10

11 380

12  
13  
14 381 **Declarations**

15  
16 382 *Ethical approval and consent to participate*  
17

18  
19 383 This study did not involve human subjects and did not involve direct interaction with patients  
20  
21 384 and therefore ethical approval was not sought. However, Ministries of Health in Uganda and  
22  
23 385 Zambia and Country Directors of Health in Kenya gave approval and provided introduction  
24  
25 386 letters to health facilities.  
26

27  
28 387

29  
30 388 *Consent for publication*  
31

32  
33 389 Not applicable  
34  
35

36 390

37  
38  
39 391 *Data sharing statement*  
40

41  
42 392 The datasets used and/or analysed during the current study are available from the  
43  
44 393 corresponding author on request.  
45

46 394

47  
48  
49 395 *Competing interests*  
50

51 396 All authors declare no competing interests.  
52

53 397

54  
55 398  
56  
57  
58  
59  
60

1  
2  
3 399 *Funding*  
4  
5

6 400 This research was funded by Health Action International through the Health Systems Advocacy  
7  
8 401 Partnership.  
9

10  
11 402  
12

13 403 *Authors' contribution*  
14  
15

16 404 DK conceptualized the project, undertook data analysis and wrote the first draft of the  
17  
18 405 manuscript; GO, RDH, JSN, HTR, HL and AM revised the manuscript and critically reviewed its  
19  
20 406 contents. GO contributed to data analysis. AM critically reviewed the manuscript, provided  
21  
22 407 comments and guidance on all drafts of manuscript.  
23  
24

25 408  
26

27 409 *Acknowledgements*  
28

29 410 The authors acknowledge data collection teams in Kenya led by Dorothy Okemo, in Uganda led  
30  
31 411 by Anthony Ssebagereka and in Zambia led by Liyoka Liyoka. We appreciate Dr. Metin  
32  
33 412 Gülmezoglu for providing comments and Daphne Ssebugwawo who edited the manuscript.  
34

35 413  
36  
37  
38  
39  
40  
41  
42  
43  
44  
45  
46  
47  
48  
49  
50  
51  
52  
53  
54  
55  
56  
57  
58  
59  
60

## References

1. World Health Organization, *Trends in maternal mortality: 2000 to 2017: estimates by WHO, UNICEF, UNFPA, World Bank Group and the United Nations Population Division*, 2019: Geneva.
2. Say L, et al., *Global causes of maternal death; a WHO systematic analysis*. *Lancet Global Health*, 2014. **2** (6): p. E323-33.
3. PSI, *Improving Maternal Health: Preventing Post-Partum Hemorrhage in Rural Zambia*, 2014: Washington D.C.
4. Kinuthia, K., M. Stephenson, and E. Maogoto, *Management of postpartum hemorrhage in a rural hospital in Kenya: a best practice implementation project*. *JBH Database System Rev Implement Rep*, 2019. **17**(2): p. 248-258.
5. Ononge, S., et al., *Incidence and risk factors for postpartum hemorrhage in Uganda*. *Reproductive Health*, 2016. **13**(38).
6. United Nations, *United Nations Commission on Life-saving Commodities for Women and Children; Commissioner's Report 2012*, United Nations: New York.
7. Ministry of Health, *Kenya Essential Medicines List 2016*, 2016: Nairobi, Kenya.
8. Ministry of Health, *Essential Medicines and Health Supplies List of Uganda*, 2016.
9. Ministry of Health, *Zambia Essential Medicines List*, 2013.
10. Tran, D.N. and L.A. Bero, *Barriers and facilitators to the quality use of essential medicines for maternal health in low-resource countries: An Ishikawa framework*. *J Global Health*, 2015. **5**(1).
11. World Health Organisation, *Recommendations for the prevention and treatment of postpartum haemorrhage*. , 2012, Department of Reproductive Health: Geneva.
12. De Groot, A.N., et al., *Oxytocin and desamino-oxytocin tablets are not stable under simulated tropical conditions*. *Journal of Clinical Pharmacy* 1995. **20**(2): p. 115-119.
13. Hogerzeil, H.V., et al., *Stability of essential drugs during shipment to the tropics*. *BMJ*, 1992. **304**(6821): p. 210-212.
14. Nazerali, H. and H.V. Hogerzeil, *The quality of essential drugs in rural Zimbabwe: controlled longitudinal study*. *BMJ*, 1998. **317**(7157): p. 512-13.
15. Karikari -Boateng, E., *Post-market quality surveillance project maternal health care products on the Ghanaian market*, 2013, Ghana Food and Drugs Authority: Accra.
16. Torloni, M.R., et al., *Quality of oxytocin available in low- and middle-income countries: a systemic review of the literature*. *BJOG*, 2016. **123**(13): p. 2076–86.
17. Stanton, C., et al., *Accessibility and potency of uterotonic drugs purchased by simulated clients in four districts in India*. *BMC Pregnancy and Childbirth* 2014. **14**(386 ): p. Page 2 of 12.
18. Anyakora, C., et al., *Quality medicines in maternal health: Results of Oxytocin, Misoprostol, Magnesium sulphate and Calcium Gluconate Quality Audits*. *BMC Pregnancy and Childbirth* 2018. **18**(1): p. 44.
19. Hofmeyr, G.J., S. Ferreira, and V.C. Nikodem, *Misoprostol for treating postpartum haemorrhage: a randomized controlled trial* *BMC Pregnancy and Childbirth*, 2004. **4**(16).
20. Alfirevic, A., et al., *Prevention of postpartum hemorrhage with misoprostol* *Int J Gynecol Obstet*, 2007. **99**(Suppl 2): p. 198–201.
21. Smith, J.M., et al., *Advance distribution of misoprostol for prevention of postpartum haemorrhage at home births in two districts of Liberia*. . *BMC Pregnancy and Childbirth*, 2014. **14**: p. 189.

- 1
- 2
- 3
- 4 22. McCormick, M.I., et al., *Averting maternal death and disability: Prevention of postpartum*
- 5 *haemorrhage in low resource settings*. International Journal of Obstetrics and Gynaecology,
- 6 2002. **77**: p. 267-275.
- 7
- 8 23. Smith, J.M., et al., *Misoprostol for postpartum haemorrhage prevention at home birth: an*
- 9 *integrative review of global implementation experience todate*. BMC Pregnancy and Childbirth
- 10 2013. **13**(44).
- 11
- 12 24. WHO, *The selection and use of essential medicines. Report of the WHO Expert Committee 2015*
- 13 *(including the 19th WHO Model List of essential medicines and the 5th WHO Model List of*
- 14 *essential medicines for children)*, 2015.
- 15
- 16 25. Caliskan, E., et al., *Oral misoprostol for third stage of labour: a randomised trial*. Obstet Gynecol,
- 17 2003. **101**(5): p. 921-8.
- 18
- 19 26. El-Refaey, H., et al., *Use of oral misoprostol in the prevention of postpartum haemorrhage*
- 20 *Obstet Gynecol*, 1997. **104**(3): p. 336-9.
- 21
- 22 27. World Health Organization, *The Selection and Use of Essential Medicines 2019. Report of the*
- 23 *22nd WHO Expert Committee on the Selection and Use of Essential Medicines, 1-5 April 2019*,
- 24 2019: Geneva.
- 25
- 26 28. Tang, J., et al., *WHO recommendations for misoprostol use for obstetric and gynaecologic*
- 27 *indications*. 2013. **121**(2): p. 186-9.
- 28
- 29 29. Chong, Y.S., L.L. Su, and S. Arulkumaran, *Misoprostol: A Quarter Century of Use, Abuse, and*
- 30 *Creative Misuse. Obstetrical and Gynecological Survey*. 2004. **59**(2): p. 128-140.
- 31
- 32 30. Theunissen, F.J., L. Chinery, and V.P. Yeshita, *Current research on carbetocin and implications for*
- 33 *prevention of postpartum haemorrhage*. BMC Reproductive Health, 2018. **15**(1): p. 94.
- 34
- 35 31. Jhpiego, *Accelovate. Brief: how can we increase global utilization of oxytocin for treatment of*
- 36 *postpartum hemorrhage*, 2015, Jhpiego: Baltimore.
- 37
- 38 32. HAI, *Sexual & Reproductive Health Commodities: Measuring Prices, Availability & Affordability;*
- 39 *Methodology & Data Entry Manual 2017*: Amsterdam.
- 40
- 41 33. WHO/HAI, *Measuring medicine prices, availability, affordability and price components*. 2nd
- 42 *ed2008*, Geneva, Switzerland: World Health Organization.
- 43
- 44 34. Madden, J.M., et al., *Measuring medicine prices in Peru: validation of key aspects of WHO/HAI*
- 45 *survey methodology*. Rev Panam Salud Publica, 2010. **27**(4): p. 291-9.
- 46
- 47 35. Cameron, A., et al., *Switching from originator brand medicines to generic equivalents in selected*
- 48 *developing countries: how much could be saved?* Value Health, 2012. **15**(5): p. 664-73.
- 49
- 50 36. Anson, A., et al., *Availability, prices and affordability of the World Health Organization's*
- 51 *essential medicines for children in Guatemala*. Global Health, 2012. **8**: p. 22.
- 52
- 53 37. Cameron, A., et al., *Mapping the availability, price, and affordability of antiepileptic drugs in 46*
- 54 *countries*. Epilepsia, 2012. **53**(6): p. 962-9.
- 55
- 56 38. Ministry of Health, *Package of Basic Health Services for Uganda*, Ministry of Health, Editor 1997,
- 57 *Ministry of Health: Kampala, Uganda*.
- 58
- 59 39. Management Sciences for Health. *International Drug Price Indicator Guide*. 2014 [cited 2016
- 60 May 5th]; Available from:  
<http://erc.msh.org/mainpage.cfm?file=1.0.htm&module=DMP&language=English>.
40. Bank of Uganda. *Exchange Rates*. 2016 [cited 2016 April 22nd]; Available from:  
[https://www.bou.or.ug/bou/collateral/exchange\\_rates.html](https://www.bou.or.ug/bou/collateral/exchange_rates.html).
41. oanda. Available from: <https://www.oanda.com/currency/converter/>.
42. Uganda Ministry of Public Service, *New salary scales for public servants for FY 2014/15*, 2014,  
Uganda Ministry of Public Service: Kampala, Uganda.



- 1  
2  
3 43. Sharp, B.E. and S.A. Miller, *Potential for Integrating Diffusion of Innovation Principles into Life*  
4 *Cycle Assessment of Emerging Technologies*. Environ. Sci. Technol, 2016. **50**(6): p. 2771–2781.  
5 44. Gonzalez, L., M. Aebersold, and C. Fenske, *Diffusion of Innovation: Faculty Barriers to Adoption*.  
6 Comput Inform Nurs, 2014. **32**(5): p. 201-4.  
7 45. Henning-Smith, C., et al., *Rural-Urban Differences in Medicare Quality Outcomes and the Impact*  
8 *of Risk Adjustment*. Med Care, 2017. **55**(1): p. 823-829.  
9 46. Alhassan, R.K. and E. Nketiah-Amponsah, *Frontline staff motivation levels and health care quality*  
10 *in rural and urban primary health facilities: a baseline study in the Greater Accra and Western*  
11 *regions of Ghana*. 2016.  
12 47. Alghanem, F. and J.M. Clements, *Narrowing performance gap between rural and urban hospitals*  
13 *for acute myocardial infarction care*. . Am J Emerg Med, 2019. pii: **S0735-6757**(19): p. 30250-5.  
14 48. Braddick, L., et al., *A mixed-methods study of barriers and facilitators to the implementation of*  
15 *postpartum hemorrhage guidelines in Uganda*. Int J Gynecol Obstet, 2016. **132**(1): p. 89-93.  
16 49. Morris, J.L. and S. Khatun, *Clinical guidelines-the challenges and opportunities: What we have*  
17 *learned from the case of misoprostol for postpartum hemorrhage*. Int J Gynecol Obstet, 2019.  
18 **144**(1): p. 122-127.  
19 50. Gallos, I.D., et al., *Which drug is best for reducing excessive blood loss after birth*. Cochrane  
20 Database Syst Rev, 2018(4).  
21  
22  
23  
24  
25  
26  
27  
28  
29  
30  
31  
32  
33  
34  
35  
36  
37  
38  
39  
40  
41  
42  
43  
44  
45  
46  
47  
48  
49  
50  
51  
52  
53  
54  
55  
56  
57  
58  
59  
60



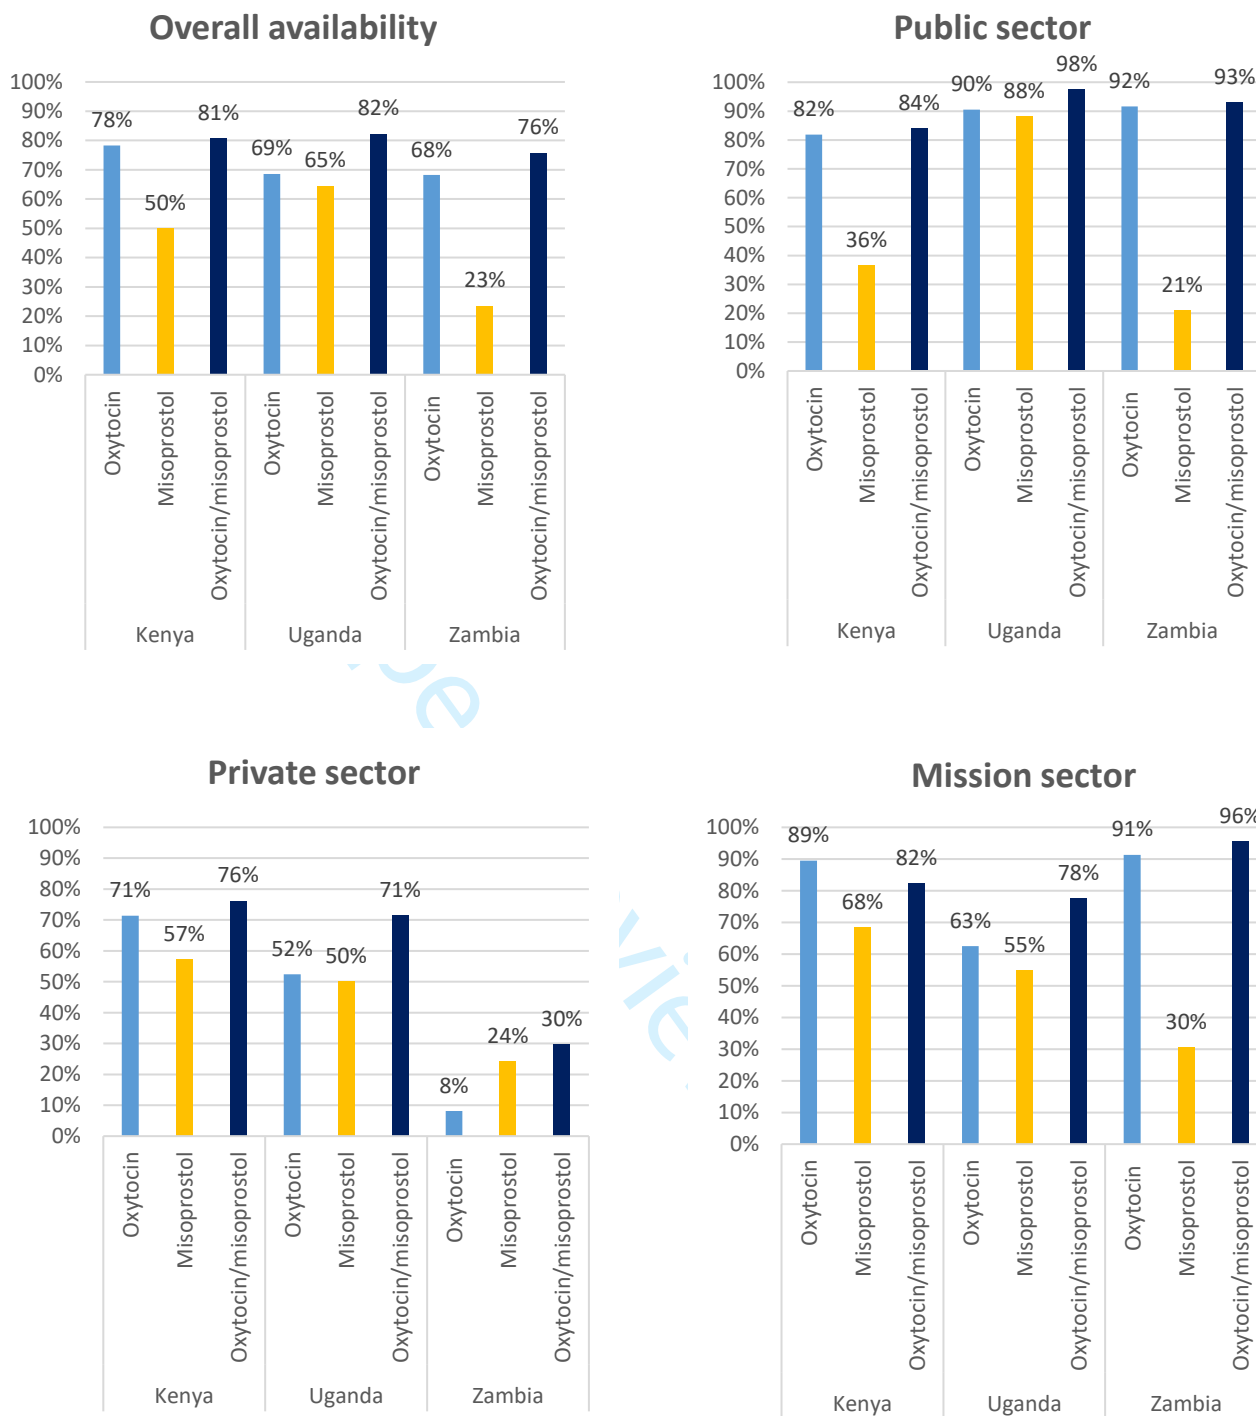

**Fig 1: Availability of oxytocin and misoprostol across sectors in Kenya, Uganda and Zambia**

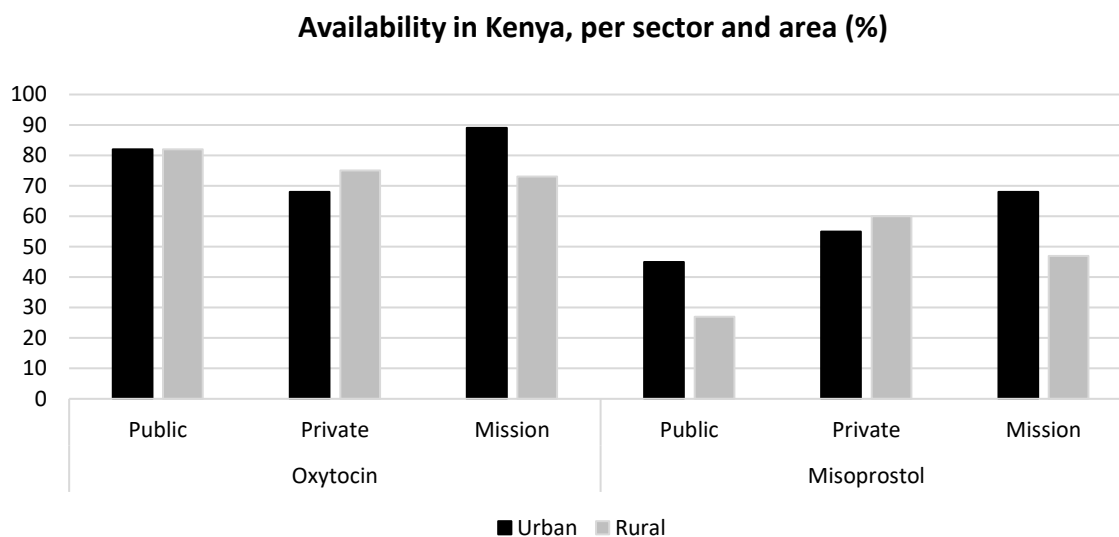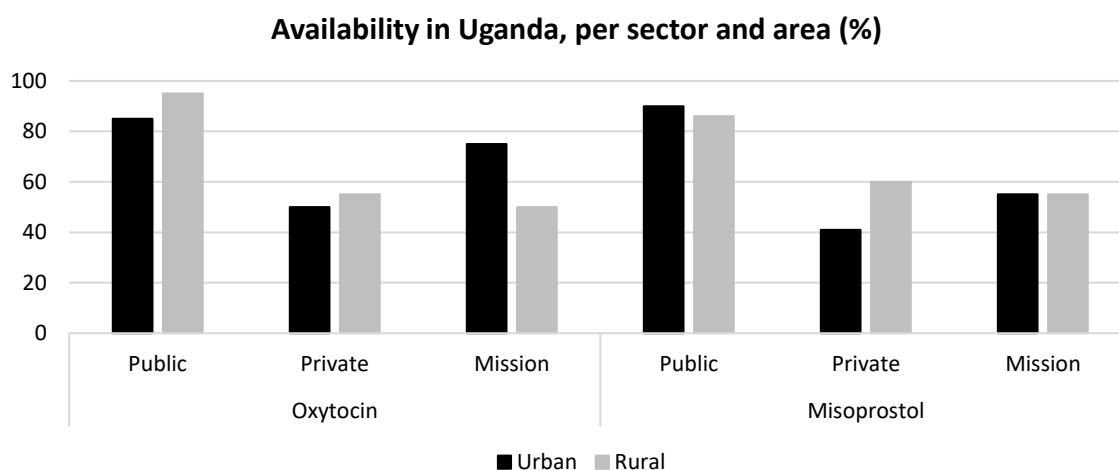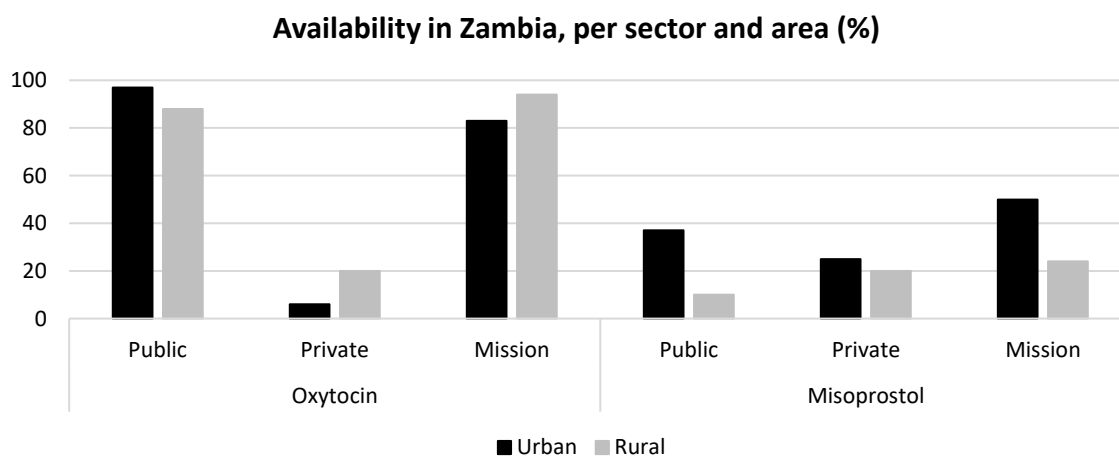

Figure 2: Availability of oxytocin and misoprostol in urban and rural facilities across countries

# BMJ Open

**Access to oxytocin and misoprostol for management of post-partum haemorrhage in Kenya, Uganda and Zambia: a cross-sectional assessment of availability, prices and affordability.**

|                                 |                                                                                                                                                                                                                                                                                                                                                                                                                                                                                                                                                                                                                                                                                                                                                                                                                                     |
|---------------------------------|-------------------------------------------------------------------------------------------------------------------------------------------------------------------------------------------------------------------------------------------------------------------------------------------------------------------------------------------------------------------------------------------------------------------------------------------------------------------------------------------------------------------------------------------------------------------------------------------------------------------------------------------------------------------------------------------------------------------------------------------------------------------------------------------------------------------------------------|
| Journal:                        | <i>BMJ Open</i>                                                                                                                                                                                                                                                                                                                                                                                                                                                                                                                                                                                                                                                                                                                                                                                                                     |
| Manuscript ID                   | bmjopen-2020-042948.R1                                                                                                                                                                                                                                                                                                                                                                                                                                                                                                                                                                                                                                                                                                                                                                                                              |
| Article Type:                   | Original research                                                                                                                                                                                                                                                                                                                                                                                                                                                                                                                                                                                                                                                                                                                                                                                                                   |
| Date Submitted by the Author:   | 26-Oct-2020                                                                                                                                                                                                                                                                                                                                                                                                                                                                                                                                                                                                                                                                                                                                                                                                                         |
| Complete List of Authors:       | Kibira, Denis; Utrecht University, Utrecht Centre for Pharmaceutical Policy and Regulation, Division of Pharmacoepidemiology and Clinical Pharmacology; Coalition for Health Promotion and Social Development (HEPS-Uganda)<br>Ooms , Gaby; Health Action International<br>van den Ham, Hendrika; Utrecht University Utrecht Institute for Pharmaceutical Sciences, WHO Collaborating Centre for Pharmaceutical Policy and Regulation, Division of Pharmacoepidemiology and Clinical Pharmacology<br>Namugambe-Kitutu, Juliet ; Mbarara University of Science and Technology, Department of Pharmacy<br>Reed, Tim; Health Action International<br>Leufkens, Hubert; Utrecht University, Utrecht Institute for Pharmaceutical Sciences<br>Mantel-Teeuwisse, Aukje; Utrecht University, Utrecht Institute for Pharmaceutical Sciences |
| <b>Primary Subject Heading</b>: | Reproductive medicine                                                                                                                                                                                                                                                                                                                                                                                                                                                                                                                                                                                                                                                                                                                                                                                                               |
| Secondary Subject Heading:      | Health policy, Global health, Obstetrics and gynaecology                                                                                                                                                                                                                                                                                                                                                                                                                                                                                                                                                                                                                                                                                                                                                                            |
| Keywords:                       | Health policy < HEALTH SERVICES ADMINISTRATION & MANAGEMENT, Maternal medicine < OBSTETRICS, REPRODUCTIVE MEDICINE                                                                                                                                                                                                                                                                                                                                                                                                                                                                                                                                                                                                                                                                                                                  |
|                                 |                                                                                                                                                                                                                                                                                                                                                                                                                                                                                                                                                                                                                                                                                                                                                                                                                                     |

SCHOLARONE™  
Manuscripts



I, the Submitting Author has the right to grant and does grant on behalf of all authors of the Work (as defined in the below author licence), an exclusive licence and/or a non-exclusive licence for contributions from authors who are: i) UK Crown employees; ii) where BMJ has agreed a CC-BY licence shall apply, and/or iii) in accordance with the terms applicable for US Federal Government officers or employees acting as part of their official duties; on a worldwide, perpetual, irrevocable, royalty-free basis to BMJ Publishing Group Ltd ("BMJ") its licensees and where the relevant Journal is co-owned by BMJ to the co-owners of the Journal, to publish the Work in this journal and any other BMJ products and to exploit all rights, as set out in our [licence](#).

The Submitting Author accepts and understands that any supply made under these terms is made by BMJ to the Submitting Author unless you are acting as an employee on behalf of your employer or a postgraduate student of an affiliated institution which is paying any applicable article publishing charge ("APC") for Open Access articles. Where the Submitting Author wishes to make the Work available on an Open Access basis (and intends to pay the relevant APC), the terms of reuse of such Open Access shall be governed by a Creative Commons licence – details of these licences and which [Creative Commons](#) licence will apply to this Work are set out in our licence referred to above.

Other than as permitted in any relevant BMJ Author's Self Archiving Policies, I confirm this Work has not been accepted for publication elsewhere, is not being considered for publication elsewhere and does not duplicate material already published. I confirm all authors consent to publication of this Work and authorise the granting of this licence.

1  
2  
3  
4 1 **Access to oxytocin and misoprostol for management of post-partum haemorrhage in Kenya,**  
5 2 **Uganda and Zambia. A cross-sectional assessment of availability, prices and affordability.**

6  
7 3 **Authors**

8 4 Denis Kibira<sup>1,2</sup>, Gaby Isabelle Ooms<sup>1,3</sup>, Hendrika A. van den Ham<sup>1</sup>, Juliet Sanyu Namugambe<sup>4</sup>, Tim Reed<sup>3</sup>,  
9 5 Hubert G. Leufkens<sup>1</sup>, Aukje K. Mantel-Teeuwisse<sup>1</sup>

10  
11 6  
12 7 **Affiliations**

13 8 <sup>1</sup> Utrecht Centre for Pharmaceutical Policy and Regulation

14 9 Utrecht Institute for Pharmaceutical Sciences

15 10 Utrecht University

16 11 Universiteitsweg 99

17 12 3584 CG Utrecht, the Netherlands

18 13 <sup>2</sup> Coalition for Health Promotion and Social Development (HEPS-Uganda)

19 14 Plot 351A, Balintuma Road, Namirembe Hill

20 15 <sup>3</sup> Health Action International

21 16 Overtoom 60 (2)

22 17 1054 HK Amsterdam, The Netherlands

23 18 <sup>4</sup> Department of Pharmacy, Mbarara University of Science and Technology

24 19 Mbarara, Uganda

25  
26 20  
27 21 **Authors email list**

28 22 DK: [dkibira@gmail.com/dkibira@heps.or.ug](mailto:dkibira@gmail.com/dkibira@heps.or.ug)

29 23 GIO: [Gaby@haiweb.org](mailto:Gaby@haiweb.org)

30 24 HDH: [H.A.vandenHam@uu.nl](mailto:H.A.vandenHam@uu.nl)

31 25 JN: [julietsanyu@gmail.com](mailto:julietsanyu@gmail.com)

32 26 TR: [Tim@haiweb.org](mailto:Tim@haiweb.org)

33 27 HL: [H.G.M.Leufkens@uu.nl](mailto:H.G.M.Leufkens@uu.nl)

34 28 AM: [a.k.mantel@uu.nl](mailto:a.k.mantel@uu.nl)

35  
36 29  
37 30 **Corresponding author**

38 31 Denis Kibira, MBA

39 32 WHO Collaborating Centre for Pharmaceutical Policy and Regulation

40 33 Utrecht University

41 34 Utrecht Institute for Pharmaceutical Sciences

42 35 Universiteitsweg 99

43 36 3584 CG Utrecht, the Netherlands

44 37 Coalition for Health Promotion and Social Development (HEPS-Uganda)

45 38 Plot 351A, Balintuma Road, Namirembe Hill, Kampala, Uganda

46 39 Email: [dkibira@gmail.com/dkibira@heps.or.ug](mailto:dkibira@gmail.com/dkibira@heps.or.ug)

47 40 Tel: +256701580120

48 41 Abstract word count: 298

49 42 Manuscript word count (excluding tables, figures and references): 3373

50 43 Number of tables and figures: 3

51  
52  
53 44  
54 45 **Key words:** Access, Oxytocin, Misoprostol, Post-partum haemorrhage

1  
2  
3 46 **Abstract**

4  
5 47 **Background**

6  
7 48 The World Health Organisation (WHO) recommends use of oxytocin and misoprostol as the two  
8  
9 49 frontline medicines for management of postpartum haemorrhage (PPH). This paper assesses  
10  
11 50 access to oxytocin and misoprostol at health facilities to improve prevention and management  
12  
13 51 of PPH by measuring their availability, prices and affordability in Kenya, Uganda and Zambia.  
14

15  
16 52  
17 53 **Methods**

18 54 An assessment was undertaken using data from Health Action International (HAI) research on  
19  
20 55 sexual and reproductive health commodities. Data was collected from 376 health facilities in  
21  
22 56 July and August 2017 using a cross-sectional design adapted from the standardized WHO/HAI  
23  
24 57 methodology.

25 58 Availability was calculated as mean percentage of sampled medicine outlets where medicine  
26  
27 59 was found on the day of data collection. Medicine prices were compared to international  
28  
29 60 reference prices (IRP) and expressed as median price ratios (MPRs). Affordability was calculated  
30  
31 61 using number of days required to pay for a standard treatment based on the daily income of  
32  
33 62 the lowest-paid government worker.  
34

35  
36 63  
37 64 **Results**

38 65 Availability of either oxytocin or misoprostol at health facilities was high; 81% in Kenya, 82% in  
39  
40 66 Uganda, and 76% in Zambia. Oxytocin was more available than misoprostol, and it was most  
41  
42 67 available in the public sector in the three countries. Availability of misoprostol was highest in  
43  
44 68 the public sector in Uganda (88%). Oxytocin and misoprostol were purchased by patients at  
45  
46 69 prices above IRP, but both medicines cost less than a day's wages and were therefore  
47  
48 70 affordable. Availability of misoprostol was poor in rural settings where it would be more  
49  
50 71 preferred due to lack of trained personnel and cold storage facilities required for oxytocin.  
51

52 72

53 73

54 74  
55  
56  
57  
58  
59  
60

## 75 **Conclusion**

76 Availability and affordability of either oxytocin or misoprostol at health facilities met the WHO  
77 benchmark of 80%. However, countries with limited resources should explore mechanisms to  
78 optimize management of PPH by improving access to misoprostol especially in rural areas.

## 80 **Strengths and limitations of this study**

- 81 • The WHO/HAI methodology that was used for this study is tested, reliable, standardized  
82 and validated for the measurement of medicine prices and availability.
- 83 • The study provides details on availability, price, and affordability of individual medicines  
84 across three sectors (public, private and mission).
- 85 • The methodology uses a cross-sectional design and therefore historical data trends were  
86 not traced.
- 87 • The study only used two frontline medicines for PPH, while countries may have had  
88 other alternative therapies including carbetocin which were not captured.
- 89 • In Zambia we surveyed 23 mission facilities which was below the 30 facilities per sector  
90 30 recommended by the methodology.

## 92 **Key questions**

### 93 *What is known?*

- 94 • The quality, efficacy and safety of oxytocin and misoprostol for management of post-  
95 partum haemorrhage have been widely studied.
- 96 • There is a knowledge gap on the accessibility of oxytocin and misoprostol in low-resource  
97 settings.

### 98 *What are the new findings?*

- 99 • Availability of either oxytocin or misoprostol was high in Kenya and Uganda and just below  
100 the WHO benchmark of 80% in Zambia.
- 101 • Both medicines cost less than a day's wages, which is considered affordable.

- 1  
2  
3 102 • The stocking of oxytocin and misoprostol by health facilities did not take into consideration  
4  
5 103 challenges faced by the facilities to administer the medicines which may explain why  
6  
7 104 management of post-partum heamorrhage has remained a problem.  
8

9 105 *What do the new findings imply?*  
10

- 11  
12 106 • Policy makers should look into how to address context-specific barriers to ensure that  
13  
14 107 medicines are adequately deployed for maximum benefit.  
15  
16 108 • Countries with limited resources should explore mechanisms to balance access to both  
17  
18 109 oxytocin and misoprostol between rural and urban areas to optimize management of PPH.  
19  
20  
21  
22  
23  
24  
25  
26  
27  
28  
29  
30  
31  
32  
33  
34  
35  
36  
37  
38  
39  
40  
41  
42  
43  
44  
45  
46  
47  
48  
49  
50  
51  
52  
53  
54  
55  
56  
57  
58  
59  
60



## 111 **Background**

112 The risk of women dying due to pregnancy and childbirth remains a major global health  
113 challenge. In 2017 there were approximately 295,000 maternal deaths globally, of which 94%  
114 occurred in low-and middle-income countries (LMICs). Sub-Saharan Africa contributed about  
115 66% to these deaths [1]. The global leading cause of maternal mortality is haemorrhage,  
116 accounting for 27% of all maternal deaths [2].

117 Postpartum haemorrhage (PPH) which occurs after childbirth accounts for most (72%) of the  
118 three forms of haemorrhage. Antepartum haemorrhage which occurs during pregnancy  
119 accounts for 24% while intrapartum haemorrhage (during childbirth) accounts for three percent  
120 [2]. PPH is responsible for 34% of maternal deaths in Kenya, 25% in Uganda and 34% in Zambia  
121 [3-5].

122 The World Health Organization (WHO) recommends oxytocin as the medicine of choice for  
123 management of PPH, and misoprostol as the second line alternative when injection capability is  
124 lacking and/or storage conditions for oxytocin are not met. Other uterotonics such as  
125 ergometrine and carbetocin are also recommended when use of oxytocin is not feasible [1].

126 The relevance of oxytocin and misoprostol to health systems was further emphasised by the  
127 United Nations Commission on Life-saving Commodities for women and children when they  
128 were listed among the 13 lifesaving, low-cost medicines with greatest proven potential to avert  
129 preventable deaths [6]. Both oxytocin and misoprostol are included in national essential  
130 medicine lists in Kenya, Uganda and Zambia [7-9].

131  
132 The quality, efficacy and safety of oxytocin and misoprostol have been widely studied [10-23].  
133 Oxytocin is temperature sensitive and should therefore be stored under refrigeration at  
134 temperatures between 2 and 8°C to prevent degradation expected at higher temperatures[10].  
135 Degradation reduces potency and consequently the effectiveness of the medicine. Oxytocin  
136 stability through the supply chain has proven a worry to policy makers and has been a subject

1  
2  
3 137 of numerous investigations to ascertain quality and efficacy [11-13]. Some studies on the  
4  
5 138 quality of oxytocin found analyzed samples to contain less active pharmaceutical ingredients  
6  
7 139 than was claimed in the label, while some samples also failed sterility tests [14-16]. LMICs with  
8  
9 140 low resources may also lack facilities required for adequate storage conditions for oxytocin to  
10  
11 141 ensure integrity of the product, while they may also lack trained health workers for its  
12  
13 142 administration [17]. Women living among displaced populations, in conflict areas, hard to reach  
14  
15 143 areas, who deliver at home or with a traditional birth attendant seldom have access to a trained  
16  
17 144 health worker. Hence, they do not have access to oxytocin or if they do, it is not safely used  
18  
19 145 [24]. As a result of these challenges, prevention and treatment of PPH in low-resource settings  
20  
21 146 using oxytocin has not provided the desired impact [18, 19].  
22

23  
24 148 Misoprostol, a prostaglandin, is an alternative to oxytocin in the management of PPH. It is  
25  
26 149 cheap, stable at room temperature and more convenient to administer. It can be administered  
27  
28 150 sublingually, orally and vaginally [19, 20, 25, 26]. It has been demonstrated through various  
29  
30 151 studies that use of misoprostol is feasible, improves uterotonic coverage, reduces incidence of  
31  
32 152 PPH and that it is effective for use at community and household level in low-resource settings  
33  
34 153 [20-22].

35  
36 154 In 2015, the WHO expert committee on the selection and use of medicines recommended the  
37  
38 155 addition of misoprostol for the prevention and treatment of postpartum haemorrhage when  
39  
40 156 oxytocin is not available or cannot be used safely [23]. At different occasions the inclusion of  
41  
42 157 misoprostol in the list of WHO recommended medicines was debated for both efficacy and  
43  
44 158 safety reasons, but the 2015 decision to recommend misoprostol in addition to oxytocin for  
45  
46 159 prevention of PPH was reaffirmed in 2019 by a WHO expert committee [27]. Before 2015  
47  
48 160 misoprostol was indicated by WHO for use in induction of labour and management of  
49  
50 161 spontaneous and induced abortion [28]. The historical use of misoprostol for termination of  
51  
52 162 pregnancies may have affected its acceptability for routine use in prevention of PPH, despite  
53  
54 163 available convincing evidence of its therapeutic effect and relative safety in management of  
55  
56 164 PPH. Another challenge is that the high doses of misoprostol required for post-partum  
57  
58 165 haemorrhage often result in troublesome side effects such as vomiting and shivering [29].

1  
2  
3 166 Further, the longer half-life of the medicine means that it stays longer in the body and has  
4  
5 167 potential to cause complications [30].  
6

7 168 These two medicines could be used complementarily to overcome challenges and barriers in  
8  
9 169 policy, health sector infrastructure and health service delivery that at the moment inhibit the  
10  
11 170 optimal management of PPH [24, 31]. However, there is a knowledge gap on the accessibility of  
12  
13 171 both medicines in low-resource settings. This is a missed opportunity in closing the gap in the  
14  
15 172 reduction of maternal mortality in developing countries. This paper therefore assesses access to  
16  
17 173 oxytocin and misoprostol in urban and rural health facilities in Kenya, Uganda and Zambia  
18  
19 174 through a cross-sectional assessment of availability, prices and affordability at the patient level  
20  
21 175 of the two medicines to facilitate the optimal management of PPH.  
22

23 176

## 24 25 177 **Methods**

26  
27  
28 178 A secondary assessment of availability and prices of oxytocin and misoprostol was undertaken  
29  
30 179 using data from Health Action International (HAI) research on sexual and reproductive health  
31  
32 180 commodities (*SRHC: Measuring Prices, Availability & Affordability* [32]. The data was collected  
33  
34 181 in Kenya, Uganda and Zambia in July and August 2017 using a cross-sectional design with  
35  
36 182 quantitative methods adapted from the standardized WHO/HAI methodology [33], which has  
37  
38 183 been validated [34] and used extensively in several countries [35-37].  
39

40 184

### 41 42 185 *Patient and Public Involvement*

43  
44 186 The research agenda for this study was set by the multi-stakeholder platform Medicines  
45  
46 187 Transparency Alliance (MeTA) Councils in Kenya, Uganda and Zambia. The study protocols were  
47  
48 188 reviewed and approved by MeTA Councils. Data collectors were selected from the membership  
49  
50 189 of MeTA within the countries. Results were validated by stakeholders including civil society.  
51  
52 190 Dissemination plans were made by MeTA councils and results were disseminated to wide  
53  
54 191 country and inter-country platforms including Ministries of Health, Parliamentarians, private  
55  
56 192 sector as well as civil society members to inform policy.  
57

193

194 *Data collection*

195 For this study, the data on availability, price and affordability of the highest and lowest-priced  
196 products of oxytocin 10IU, 1ml injections and misoprostol 200 µg tablets were extracted.

197 In each of the three countries, six geographical areas (districts, municipalities or counties) were  
198 selected; the country's main urban centre and five other areas which were randomly selected.

199 All survey areas were reachable within one day's travel from the country's main urban centre  
200 using a car or bus. Each survey area covered a population of between 100 000 and 250 000  
201 people.

202  
203 The WHO/HAI methodology prescribes a minimum of 30 health facilities from each of the  
204 sectors, i.e. public, private and mission sectors, giving a minimum total of 90 facilities per  
205 country [33]. In each survey area, the main public hospital was selected first. Then, eight public  
206 health facilities, four each from urban and rural areas, representing levels of care at which  
207 SRHCs should be made available, were randomly selected [38]. Additionally, eight private (for  
208 profit) and eight mission sector (not for profit) health facilities (four each from urban and rural  
209 areas) that were within a three-hour drive radius of the main hospitals were selected. Thus, a  
210 total of 24 health facilities were sampled from each of the six survey areas in Kenya, Uganda  
211 and Zambia, respectively, giving a total of 144 facilities per country.

212  
213 Eight data collectors with experience of conducting medicine surveys worked in pairs of a  
214 pharmacist and a social scientist under close supervision of a qualified survey manager. Prior to  
215 data collection, the team was trained on the methodology. Data collectors used a semi-  
216 structured questionnaire administered to facility managers while physically ascertaining the  
217 availability of surveyed medicines. Availability was measured by the physical presence of a  
218 product in the outlet at the time of the survey. For each medicine surveyed, data collectors  
219 recorded the product name for both the highest and lowest-priced medicines available, the  
220 manufacturer and unit price of the product. In the public sector in Uganda and Zambia where  
221 medicines are free of charge to care seekers, prices were not recorded.

1  
2  
3 222  
4  
5 223 Once data collection was complete, survey data was entered into a pre-programmed Microsoft  
6  
7 224 Excel Workbook provided as part of the modified methodology. Data input was independently  
8  
9 225 checked for errors. Additional quality control measures were executed at various stages  
10  
11 226 throughout the study by a survey manager. The survey tools were pre-tested in Uganda in 2016  
12  
13 227 and a field test was conducted by all data collectors prior to data collection. Each data  
14  
15 228 collection team had a supervisor who cross checked the data on a daily basis for completeness,  
16  
17 229 legibility and consistency and reported to the survey manager. Prior to data entry all relayed  
18  
19 230 data was checked for completeness and consistency.  
20  
21 231

### 22 232 *Data analysis*

23  
24  
25 233 The availability of oxytocin and misoprostol was calculated as the percentage of sampled  
26  
27 234 medicine outlets where the medicine was found. Availability was also calculated for the  
28  
29 235 presence of either oxytocin or misoprostol at a facility. Data were reported in aggregate as  
30  
31 236 public, private or mission sector medicine outlets. Overall availability per sector was calculated  
32  
33 237 as mean of the two medicines surveyed.  
34  
35 238

36  
37  
38 239 Patient prices were collected in local currency including Shillings in Uganda and Kenya, and  
39  
40 240 Kwacha in Zambia. The mean, minimum and maximum unit prices were calculated. To facilitate  
41  
42 241 cross-country comparisons, medicine prices obtained during the survey were expressed as  
43  
44 242 ratios relative to a standard set of international reference prices by dividing the mean unit  
45  
46 243 price (in dollars) by the Management Sciences for Health international buyers' reference unit  
47  
48 244 price derived on September 25<sup>th</sup> 2018 [39]. Mean price ratios (MPRs) were only calculated for  
49  
50 245 oxytocin and misoprostol products that had price data from at least four medicine outlets per  
51  
52 246 sector [33]. The exchange rate used to calculate MPRs was 1 USD = 102.67 Kenya Shillings (KES),  
53  
54 247 1 USD = 3667.9 Uganda Shillings (UGX), 1 USD = 8.85 Zambia Kwacha (ZMW) taken on 1<sup>st</sup> July,  
55  
56 248 2017 prior to the first day of data collection [40, 41].  
57  
58  
59  
60

1  
2  
3 249  
4  
5  
6 250 Affordability was calculated using the number of days' wages it requires to pay for standard  
7  
8 251 treatment or dose of treatment based on the daily income of the lowest-paid government  
9  
10 252 worker (LPGW) [33]. The daily wage of a LPGW is approximately KES 411 (USD 4) in Kenya, 6255  
11 253 UGX (USD 1.78) in Uganda, and ZMW 96.7 (USD 10.92) in Zambia, as per public service salary  
12  
13 254 structures [42]. Treatments that required more than one day's wages to purchase were  
14  
15 255 considered unaffordable [33].  
16  
17  
18 256  
19  
20

## 21 257 **Results**

22  
23 258 A total of 376 health facilities, including 120, 124 and 132 health facilities in Kenya, Uganda and  
24  
25 259 Zambia, respectively, were surveyed as shown in figure 1 and 2.  
26  
27

### 28 260 29 30 261 *Availability across sectors*

31  
32  
33 262 Figure 1 shows the availability of either oxytocin or misoprostol at the surveyed health facilities  
34  
35 263 in the three countries. Overall availability of either oxytocin or misoprostol met the WHO  
36  
37 264 benchmark of 80% in Kenya (81%) and Uganda (82%) but was marginally lower in Zambia (76%).  
38  
39 265 Availability of oxytocin was higher than misoprostol except in Uganda. Availability of either  
40  
41 266 oxytocin or misoprostol was comparable between the public and mission sectors.  
42  
43

44  
45 267  
46 268 In the public sector, the three countries met the WHO benchmark for availability of oxytocin.  
47  
48 269 Misoprostol was only optimally available in the public sector in Uganda (88%), with availability  
49  
50 270 in Kenya and Zambia lower (36% and 21%, respectively). In the private sector, none of the  
51  
52 271 countries met the WHO recommended availability for misoprostol. Availability in Zambia was  
53  
54 272 especially low (24%).  
55  
56

57  
58  
59 273  
60

1  
2  
3 2744  
5  
6 275 *Availability in urban versus rural areas*  
7

8  
9 276 Figure 2 shows availability in urban versus rural areas. Oxytocin was available in over 80% of all  
10 277 public urban and rural facilities across the three countries. Optimum availability of 80% was  
11 278 further achieved for oxytocin in Kenya mission urban facilities (89%) and in Zambia's mission  
12 279 sector for both urban and rural facilities (83% and 94%, respectively). Optimum availability of  
13 280 misoprostol was only achieved in Ugandan public urban and rural facilities (90% and 86%,  
14 281 respectively).

15  
16  
17  
18  
19  
20  
21 282

22  
23  
24 283 In Kenya, oxytocin had a higher availability than misoprostol across all urban and rural facilities  
25 284 in the three sectors. Availability of misoprostol was lowest in the public sector: availability in  
26 285 urban facilities was 45%, and 27% in rural facilities. In the private sector, there was a higher  
27 286 availability in rural facilities than in urban facilities for both oxytocin and misoprostol.

28  
29  
30  
31  
32 287

33  
34  
35 288 In Uganda, the public sector was optimally stocked with both oxytocin and misoprostol across  
36 289 urban and rural facilities. Rural public facilities had a higher availability of oxytocin than urban  
37 290 public facilities. In the private sector, rural facilities also had a higher availability of oxytocin and  
38 291 misoprostol compared to urban facilities.

39  
40  
41  
42  
43 292

44  
45  
46 293 Oxytocin had a high availability in Zambia's public and mission sectors across both urban and  
47 294 rural facilities. Availability in the private sector was very low. Availability of misoprostol was low  
48 295 across the sectors and areas, with highest availability found in urban mission facilities (50%).  
49 296 Although both oxytocin and misoprostol were poorly available in the private sector, oxytocin  
50 297 was more available in rural than urban facilities, while misoprostol had a higher availability in  
51 298 urban facilities than in rural facilities.

299

300 *Prices and affordability*

301 Oxytocin and misoprostol were free for patients in the public and mission sectors in Zambia,  
302 and in the public sector in Uganda. In Kenya's public sector, the lowest price was noted for  
303 oxytocin, with a median price ratio (MPR) of USD 0.174 (Table 1). Both misoprostol and  
304 oxytocin cost less than a day's wages for a LPGW across all countries and sectors, and can  
305 therefore be considered affordable.

306

307 Notwithstanding the sectors in which the medicines were for free, the MPRs for oxytocin and  
308 misoprostol were above one in the countries, ranging from 1.37 for misoprostol in Kenya's  
309 public sector to 29.95 for misoprostol in the private sector in Zambia. This meant that both  
310 misoprostol and oxytocin were accessed by patients at prices that were more expensive  
311 compared to international reference prices.



**Table 1: Prices and affordability of misoprostol and oxytocin across countries**

|               |             | Public      |                  |                                                    | Private     |                   |                                                    | Mission     |                  |                                                    |
|---------------|-------------|-------------|------------------|----------------------------------------------------|-------------|-------------------|----------------------------------------------------|-------------|------------------|----------------------------------------------------|
|               |             | Price (USD) | Mean Price Ratio | Affordability of treatment (number of day's wages) | Price (USD) | Mean Price Ratio* | Affordability of treatment (number of day's wages) | Price (USD) | Mean Price Ratio | Affordability of treatment (number of day's wages) |
| <b>Kenya</b>  | Oxytocin    | 0.029       | 0.17             | 0.01                                               | 1.354       | 8.14              | 0.34                                               | 0.672       | 4.04             | 0.30                                               |
|               | Misoprostol | 0.273       | 1.37             | 0.07                                               | 1.967       | 9.84              | 0.49                                               | 1.217       | 6.09             | 0.17                                               |
|               |             |             |                  |                                                    |             |                   |                                                    |             |                  |                                                    |
| <b>Uganda</b> | Oxytocin    | 0           | NA               | NA                                                 | 0.998       | 5.99              | 0.57                                               | 0.408       | 2.45             | 0.23                                               |
|               | Misoprostol | 0           | NA               | NA                                                 | 0.589       | 2.95              | 0.34                                               | 0.39        | 1.95             | 0.22                                               |
|               |             |             |                  |                                                    |             |                   |                                                    |             |                  |                                                    |
| <b>Zambia</b> | Oxytocin    | 0           | NA               | NA                                                 | 0.678       | 4.08              | 0.06                                               | NA          | NA               | NA                                                 |
|               | Misoprostol | 0           | NA               | NA                                                 | 5.989       | 29.95             | 0.55                                               | NA          | NA               | NA                                                 |

NA=not applicable, USD=United States Dollar

1  
2  
3  
4 312 **Discussion**

5 313 This paper assesses access to oxytocin and misoprostol in urban and rural health facilities in  
6 314 Kenya, Uganda and Zambia through a cross-sectional assessment of availability, prices and  
7 315 affordability at the patient level of the two medicines to facilitate the optimal management of  
8  
9 316 PPH.  
10  
11  
12

13 317  
14 318 Overall, availability of uterotonics, expressed as the presence of either oxytocin or misoprostol,  
15 319 was high in Kenya and Uganda, and just below the WHO benchmark of 80% in Zambia.  
16 320 Misoprostol was markedly less available than oxytocin. Oxytocin and misoprostol were  
17 321 accessed by patients in the private sector at prices that were more expensive than the  
18 322 international reference prices. However, both medicines cost less than a day's wages, which is  
19 323 considered affordable. The availability of misoprostol across urban and rural areas did not show  
20 324 the expected pattern of having a higher availability of the medicine in rural areas, which are  
21 325 more prone to health system barriers for use of oxytocin.  
22  
23  
24  
25  
26  
27  
28

29 326  
30  
31 327 Oxytocin availability was high in the public and mission sectors but lower in the private sector,  
32 328 particularly in Zambia. In the private sector, none of the countries met the WHO availability  
33 329 benchmark of 80% for the two medicines. Besides the public sector in Uganda, misoprostol was  
34 330 not optimally available in the other countries or sectors. Misoprostol had a low availability,  
35 331 particularly in rural areas where the medicine ought to play a major role given that facilities in  
36 332 these areas tend to lack adequately trained health workers and the health infrastructure  
37 333 required to maintain cold chain to safeguard the quality of oxytocin [17]. Its poor availability in  
38 334 Kenya and Zambia may be a result of slow diffusion of the intervention into the health system  
39 335 [43, 44]. Moreover, misoprostol has been recommended by WHO for use in PPH since 2015  
40 336 after several rounds of weighing the benefits and risks, but the debate about its role in PPH  
41 337 prevention has continued over the years [23, 27]. The fear and stigma amongst health workers  
42 338 about the use of misoprostol to induce abortions may also have contributed to the situation  
43 339 [29]. In contrast, Uganda's efforts as an early adaptor [43, 44] to ensure availability of  
44 340 misoprostol through government procurement and community level distribution strategies may  
45  
46  
47  
48  
49  
50  
51  
52  
53  
54  
55  
56  
57  
58  
59  
60

1  
2  
3 341 explain why it has a higher availability of misoprostol, as well as lower PPH levels compared to  
4  
5 342 Kenya and Zambia (25% in Uganda versus 34% in both Kenya and Zambia) [3-5].  
6

7 343  
8  
9 344 Urban facilities have better health infrastructure such as cold chain facilities, and also tend to  
10  
11 345 have more health workers compared to rural facilities [45-47]. It would therefore be expected  
12  
13 346 that these urban areas would have a higher availability of oxytocin and lower availability of  
14  
15 347 misoprostol than rural facilities. However, there were instances when rural facilities had a  
16  
17 348 higher availability of oxytocin and a lower availability of misoprostol. This may indicate that  
18  
19 349 stocking of oxytocin and misoprostol by health facilities does not take into consideration  
20  
21 350 challenges faced by the facilities to administer the medicines. It will require more research in  
22  
23 351 this area to better understand the data and for policy makers to look into how to address  
24  
25 352 context-specific barriers related to these medicines by ensuring that they are deployed where  
26  
27 353 they can have maximum impact [48, 49]. For example, efforts should be made to deploy more  
28  
29 354 misoprostol in rural areas where there is a lack of adequately trained personnel and a lack of  
30  
31 355 health infrastructure to properly use oxytocin, and to ensure that both medicines are available  
32  
33 356 to complement one another depending on circumstances.

34  
35 357  
36  
37 358 PPH levels across the countries are high despite health facilities having reached the WHO  
38  
39 359 benchmark for availability of either oxytocin or misoprostol across the three countries. This  
40  
41 360 may confirm the finding from a study by Ononge et al that despite use of uterotonics, incidence  
42  
43 361 of PPH remains high [5]. It may be that some oxytocin found at health facilities may not have  
44  
45 362 the quality and efficacy for optimum management of PPH [14-16]. Countries should strive for  
46  
47 363 universal access as the 80% availability benchmark by WHO still leaves one in five facilities  
48  
49 364 without required medicine. However, availability of a medicine alone does not guarantee that it  
50  
51 365 is used, health worker beliefs and knowledge as well as necessary infrastructure such as  
52  
53 366 electricity and equipment are needed to reduce PPH levels.

54  
55 367  
56  
57 368 Studies have shown that combinations of uterotonics have proven to be more effective. For  
58  
59 369 example, a misoprostol plus oxytocin combination was found to be more effective in preventing  
60

1  
2  
3 370 PPH than the currently used standard of oxytocin only [50]. This argument further emphasizes  
4  
5 371 that having both oxytocin and misoprostol available at the health facility could help to improve  
6  
7 372 PPH management.  
8

9  
10 373 Although oxytocin and misoprostol were affordable to patients, the private sector prices were  
11  
12 374 varied and more expensive compared to IRPs. For example, the MPR of misoprostol ranged  
13  
14 375 from 1.37 in Kenya to 29.95 in Zambia. Therefore, even though availability met the WHO  
15  
16 376 benchmark, individual patients may still be confronted with unavailability in the public sector,  
17  
18 377 pushing them to seek care in the private sector where they may not be able to afford the prices  
19  
20 378 of medicines. This suggests that countries need to explore pricing policies to improve  
21  
22 379 affordability of the medicines.  
23

24 380  
25 381 The WHO/HAI methodology that was used for this study is tested, reliable, standardized and  
26  
27 382 validated for the measurement of medicine prices and availability [34]. The study provides  
28  
29 383 details on availability, price, and affordability of individual medicines across three sectors  
30  
31 384 (public, private and mission). The methodology uses a cross-sectional design and therefore  
32  
33 385 historical data trends were not traced. The study only used two frontline medicines for PPH,  
34  
35 386 while countries may have had other alternative therapies including carbetocin which were not  
36  
37 387 captured. The number of mission facilities surveyed in Zambia (23) was below the minimum  
38  
39 388 (30) recommended for the methodology per sector [33]. The findings presented here may not  
40  
41 389 be used to predict country pharmaceutical supply chain but are intended to stimulate policy  
42  
43 390 discussions on deliberate targeting and the use of available technologies to improve access.  
44

45 391

## 46 392 **Conclusion**

47 393 Availability of oxytocin and misoprostol met the WHO benchmark in Kenya and Uganda but was  
48  
49 394 just below the WHO benchmark in Zambia. In general, oxytocin was more available than  
50  
51 395 misoprostol. Oxytocin and misoprostol were purchased by patients at prices above  
52  
53 396 international reference prices but both medicines cost less than a day's wages for a LPGW and  
54  
55 397 were therefore considered affordable. However, there was no strategy in place that looked at  
56  
57 398 which medicine could be best utilized in which area. Countries with limited resources should

399 explore mechanisms to balance access to both oxytocin and misoprostol between rural and  
400 urban areas to optimize management of PPH.

#### 401 **List of abbreviations**

402 Post-partum haemorrhage (PPH); Median price ratio (MPR); Low- and middle-income countries  
403 (LMICs); Lowest-paid government worker (LPGW); sexual and reproductive health commodities  
404 (SRHC); Health Action International (HAI); World Health Organisation (WHO).

405

#### 406 **Declarations**

407 *Ethical approval and consent to participate*

408 This study did not involve human subjects and did not involve direct interaction with patients  
409 and therefore ethical approval was not sought. However, Ministries of Health in Uganda and  
410 Zambia and Country Directors of Health in Kenya gave approval and provided introduction  
411 letters to health facilities.

412

413 *Consent for publication*

414 Not applicable

415

416 *Availability of data and materials*

417 The datasets used and/or analysed during the current study are available from the  
418 corresponding author on request.

419

420 *Competing interests*

421 All authors declare no competing interests.

1  
2  
3 422  
4  
56 423 *Funding*  
7  
89 424 This research was funded by Health Action International through the Health Systems Advocacy  
10 Partnership.  
11 425  
1213 426  
14  
1516 427 *Authors' contribution*  
17  
1819 428 DK conceptualized the project, undertook data analysis and wrote the first draft of the  
20 manuscript; GOI contributed to data analysis; GOI, HDH, JN, TR, HL and AM revised the  
21 429 manuscript and critically reviewed its contents. GO contributed to data analysis. AM critically  
22 430 reviewed the manuscript, provided comments and guidance on all drafts of manuscript.  
23 431  
24  
25  
2627 432  
28  
2930 433 *Acknowledgements*  
31  
3233 434 The authors acknowledge data collection teams in Kenya led by Dorothy Okemo, in Uganda led  
34 435 by Anthony Ssebagereka and in Zambia led by Liyoka Liyoka. We appreciate Dr. Metin  
35 436 Gülmezoglu for providing comments and Daphne Ssebugwawo who edited the manuscript.  
36  
37  
3839 437  
40  
41  
42  
43  
44  
45  
46  
47  
48  
49  
50  
51  
52  
53  
54  
55  
56  
57  
58  
59  
60

## References

1. World Health Organization, *Trends in maternal mortality: 2000 to 2017: estimates by WHO, UNICEF, UNFPA, World Bank Group and the United Nations Population Division*, 2019: Geneva.
2. Say L, et al., *Global causes of maternal death; a WHO systematic analysis*. *Lancet Global Health*, 2014. **2** (6): p. E323-33.
3. PSI, *Improving Maternal Health: Preventing Post-Partum Hemorrhage in Rural Zambia*, 2014: Washington D.C.
4. Kinuthia, K., M. Stephenson, and E. Maogoto, *Management of postpartum hemorrhage in a rural hospital in Kenya: a best practice implementation project*. *JBI Database System Rev Implement Rep*, 2019. **17**(2): p. 248-258.
5. Ononge, S., et al., *Incidence and risk factors for postpartum hemorrhage in Uganda*. *Reproductive Health*, 2016. **13**(38).
6. United Nations, *United Nations Commission on Life-saving Commodities for Women and Children; Commissioner's Report 2012*, United Nations: New York.
7. Ministry of Health, *Kenya Essential Medicines List 2016*, 2016: Nairobi, Kenya.
8. Ministry of Health, *Essential Medicines and Health Supplies List of Uganda*, 2016.
9. Ministry of Health, *Zambia Essential Medicines List*, 2013.
10. World Health Organisation, *Recommendations for the prevention and treatment of postpartum haemorrhage*. , 2012, Department of Reproductive Health: Geneva.
11. De Groot, A.N., et al., *Oxytocin and desamino-oxytocin tablets are not stable under simulated tropical conditions*. *Journal of Clinical Pharmacy* 1995. **20**(2): p. 115-119.
12. Hogerzeil, H.V., et al., *Stability of essential drugs during shipment to the tropics*. *BMJ*, 1992. **304**(6821): p. 210-212.
13. Nazerali, H. and H.V. Hogerzeil, *The quality of essential drugs in rural Zimbabwe: controlled longitudinal study*. *BMJ*, 1998. **317**(7157): p. 512-13.
14. Karikari -Boateng, E., *Post-market quality surveillance project maternal health care products on the Ghanaian market*, 2013, Ghana Food and Drugs Authority: Accra.
15. Torloni, M.R., et al., *Quality of oxytocin available in low- and middle-income countries: a systemic review of the literature*. *BJOG*, 2016. **123**(13): p. 2076–86.
16. Stanton, C., et al., *Accessibility and potency of uterotonic drugs purchased by simulated clients in four districts in India*. *BMC Pregnancy and Childbirth* 2014. **14**(386 ): p. Page 2 of 12.
17. Anyakora, C., et al., *Quality medicines in maternal health: Results of Oxytocin, Misoprostol, Magnesium sulphate and Calcium Gluconate Quality Audits*. *BMC Pregnancy and Childbirth* 2018. **18**(1): p. 44.
18. Hofmeyr, G.J., S. Ferreira, and V.C. Nikodem, *Misoprostol for treating postpartum haemorrhage: a randomized controlled trial* *BMC Pregnancy and Childbirth*, 2004. **4**(16).
19. Alfirevic, A., et al., *Prevention of postpartum hemorrhage with misoprostol* *Int J Gynecol Obstet*, 2007. **99**(Suppl 2): p. 198–201.
20. Smith, J.M., et al., *Advance distribution of misoprostol for prevention of postpartum haemorrhage at home births in two districts of Liberia*. . *BMC Pregnancy and Childbirth*, 2014. **14**: p. 189.
21. McCormick, M.I., et al., *Averting maternal death and disability: Prevention of postpartum haemorrhage in low resource settings*. *International Journal of Obstetrics and Gynaecology*, 2002. **77**: p. 267-275.



- 1
- 2
- 3
- 4 22. Smith, J.M., et al., *Misoprostol for postpartum haemorrhage prevention at home birth: an integrative review of global implementation experience to date*. BMC Pregnancy and Childbirth 2013. **13**(44).
- 5
- 6 23. World Health Organisation, *The selection and use of essential medicines. Report of the WHO Expert Committee 2015( including the 19th WHO Model list of essential medicines and the 5th WHO Model list of essential medicines for children)*, 2015: Geneva.
- 7
- 8
- 9
- 10 24. Tran, D.N. and L.A. Bero, *Barriers and facilitators to the quality use of essential medicines for maternal health in low-resource countries: An Ishikawa framework*. J Global Health, 2015. **5**(1).
- 11
- 12 25. Caliskan, E., et al., *Oral misoprostol for third stage of labour: a randomised trial*. Obstet Gynecol, 2003. **101**(5): p. 921-8.
- 13
- 14 26. El-Refaey, H., et al., *Use of oral misoprostol in the prevention of postpartum haemorrhage* Obstet Gynecol, 1997. **104**(3): p. 336-9.
- 15
- 16 27. World Health Organization, *The Selection and Use of Essential Medicines 2019. Report of the 22nd WHO Expert Committee on the Selection and Use of Essential Medicines, 1-5 April 2019*, 2019: Geneva.
- 17
- 18
- 19
- 20 28. Tang, J., et al., *WHO recommendations for misoprostol use for obstetric and gynaecologic indications*. 2013. **121**(2): p. 186-9.
- 21
- 22 29. Chong, Y.S., L.L. Su, and S. Arulkumaran, *Misoprostol: A Quarter Century of Use, Abuse, and Creative Misuse*. *Obstetrical and Gynecological Survey*. 2004. **59**(2): p. 128-140.
- 23
- 24 30. Theunissen, F.J., L. Chinery, and V.P. Yeshita, *Current research on carbetocin and implications for prevention of postpartum haemorrhage*. BMC Reproductive Health, 2018. **15**(1): p. 94.
- 25
- 26 31. Jhpiego, *Accelovate. Brief: how can we increase global utilization of oxytocin for treatment of postpartum hemorrhage*, 2015, Jhpiego: Baltimore.
- 27
- 28 32. HAI, *Sexual & Reproductive Health Commodities: Measuring Prices, Availability & Affordability; Methodology & Data Entry Manual 2017*: Amsterdam.
- 29
- 30
- 31 33. WHO/HAI, *Measuring medicine prices, availability, affordability and price components*, 2008: Geneva, Switzerland.
- 32
- 33 34. Madden, J.M., et al., *Measuring medicine prices in Peru: validation of key aspects of WHO/HAI survey methodology*. Rev Panam Salud Publica, 2010. **27**(4): p. 291-9.
- 34
- 35 35. Cameron, A., et al., *Switching from originator brand medicines to generic equivalents in selected developing countries: how much could be saved?* Value Health, 2012. **15**(5): p. 664-73.
- 36
- 37 36. Anson, A., et al., *Availability, prices and affordability of the World Health Organization's essential medicines for children in Guatemala*. Global Health, 2012. **8**: p. 22.
- 38
- 39 37. Cameron, A., et al., *Mapping the availability, price, and affordability of antiepileptic drugs in 46 countries*. Epilepsia, 2012. **53**(6): p. 962-9.
- 40
- 41 38. Ministry of Health Uganda, *Package of Basic Health Services for Uganda*, 1997: Kampala, Uganda.
- 42
- 43 39. Management Sciences for Health, *International Drug Price Indicator Guide 2014 Edition*, 2015, MSH: Medford, Mass.
- 44
- 45 40. Bank of Uganda. *Exchange rates*. 2016 [cited 2016 22nd April 2016]; Available from: <https://www.bou.or.ug/bou/bouwebsite/ExchangeRates/>.
- 46
- 47 41. oanda. Available from: <https://www.oanda.com/currency/converter/>.
- 48
- 49 42. Ministry of Public Service Uganda, *New Salary Structures for Public Servants for FY 2014/15*, 2014: Kampala, Uganda.
- 50
- 51 43. Sharp, B.E. and S.A. Miller, *Potential for Integrating Diffusion of Innovation Principles into Life Cycle Assessment of Emerging Technologies*. Environ. Sci. Technol, 2016. **50**(6): p. 2771–2781.
- 52
- 53
- 54
- 55
- 56
- 57
- 58
- 59
- 60



- 1  
2  
3 44. Gonzalez, L., M. Aebbersold, and C. Fenske, *Diffusion of Innovation: Faculty Barriers to Adoption*.  
4 Comput Inform Nurs, 2014. **32**(5): p. 201-4.  
5 45. Henning-Smith, C., et al., *Rural-Urban Differences in Medicare Quality Outcomes and the Impact*  
6 *of Risk Adjustment*. Med Care, 2017. **55**(1): p. 823-829.  
7 46. Alhassan, R.K. and E. Nketiah-Amponsah, *Frontline staff motivation levels and health care quality*  
8 *in rural and urban primary health facilities: a baseline study in the Greater Accra and Western*  
9 *regions of Ghana*. 2016.  
10 47. Alghanem, F. and J.M. Clements, *Narrowing performance gap between rural and urban hospitals*  
11 *for acute myocardial infarction care*. . Am J Emerg Med, 2019. pii: **S0735-6757**(19): p. 30250-5.  
12 48. Braddick, L., et al., *A mixed-methods study of barriers and facilitators to the implementation of*  
13 *postpartum hemorrhage guidelines in Uganda*. Int J Gynecol Obstet, 2016. **132**(1): p. 89-93.  
14 49. Morris, J.L. and S. Khatun, *Clinical guidelines-the challenges and opportunities: What we have*  
15 *learned from the case of misoprostol for postpartum hemorrhage*. Int J Gynecol Obstet, 2019.  
16 **144**(1): p. 122-127.  
17 50. Gallos, I.D., et al., *Which drug is best for reducing excessive blood loss after birth*. Cochrane  
18 Database Syst Rev, 2018(4).  
19  
20  
21  
22  
23  
24  
25  
26  
27  
28  
29  
30  
31  
32  
33  
34  
35  
36  
37  
38  
39  
40  
41  
42  
43  
44  
45  
46  
47  
48  
49  
50  
51  
52  
53  
54  
55  
56  
57  
58  
59  
60

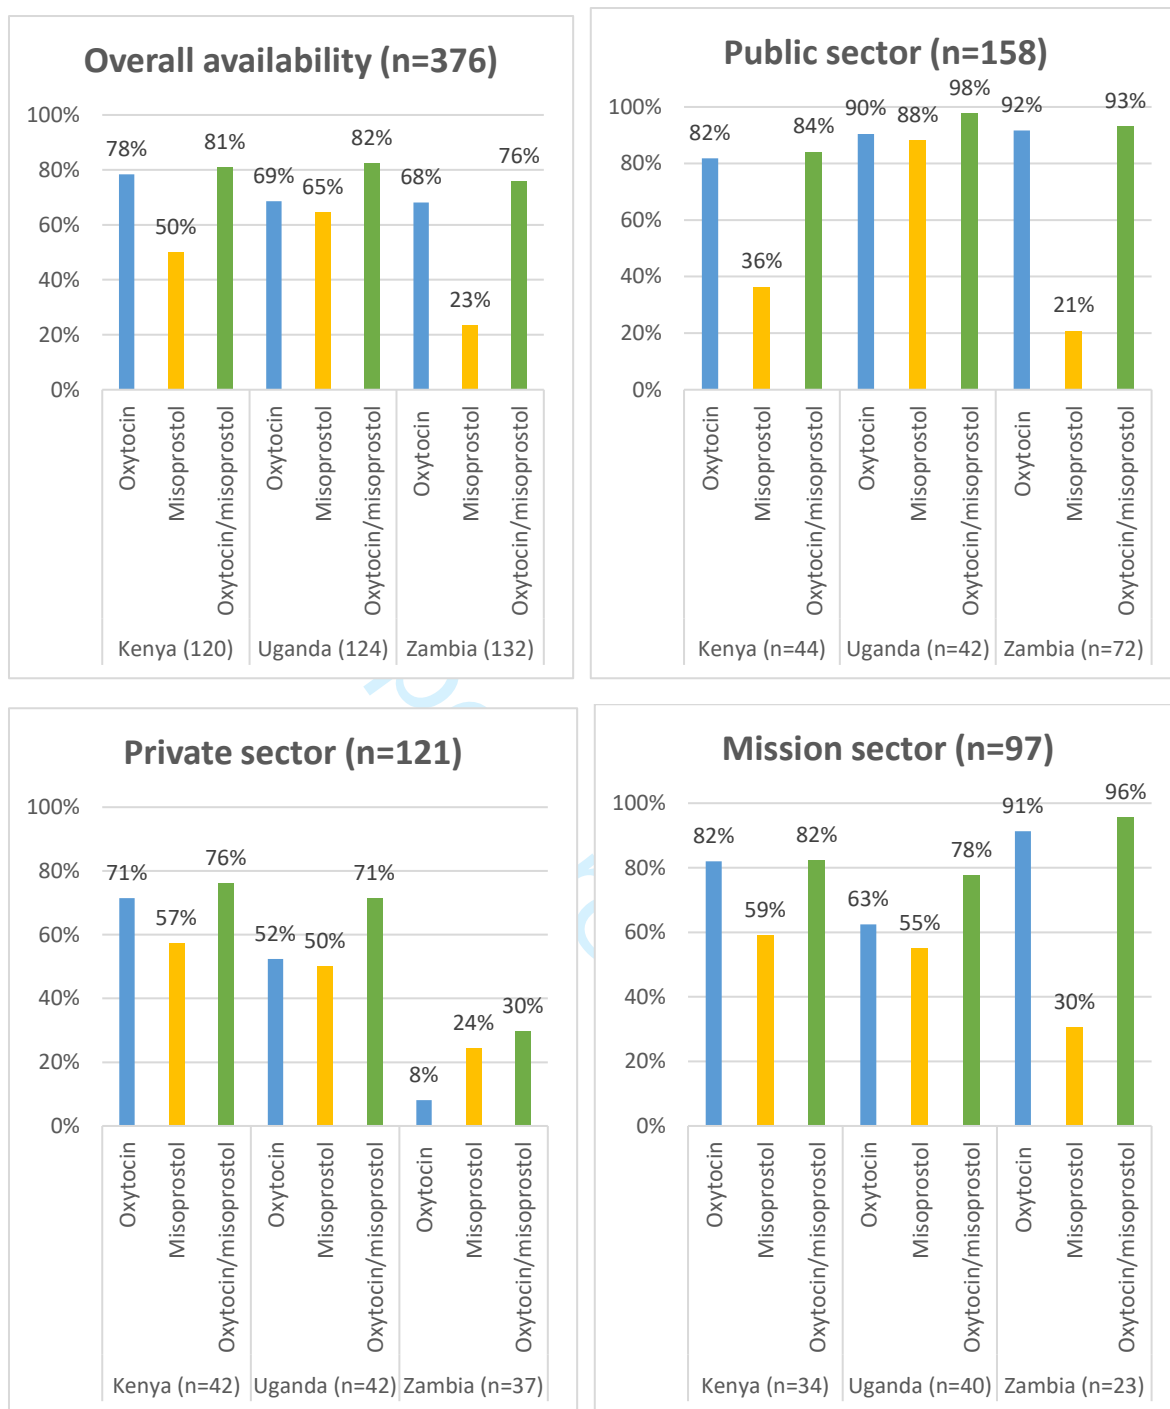

**Fig 1: Availability of oxytocin and misoprostol across sectors in Kenya, Uganda and Zambia**

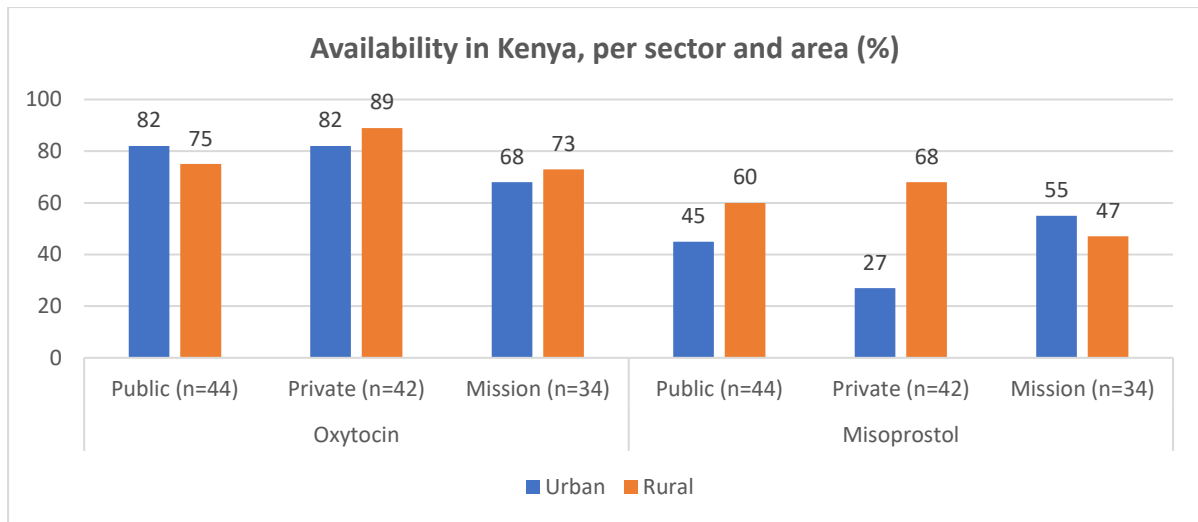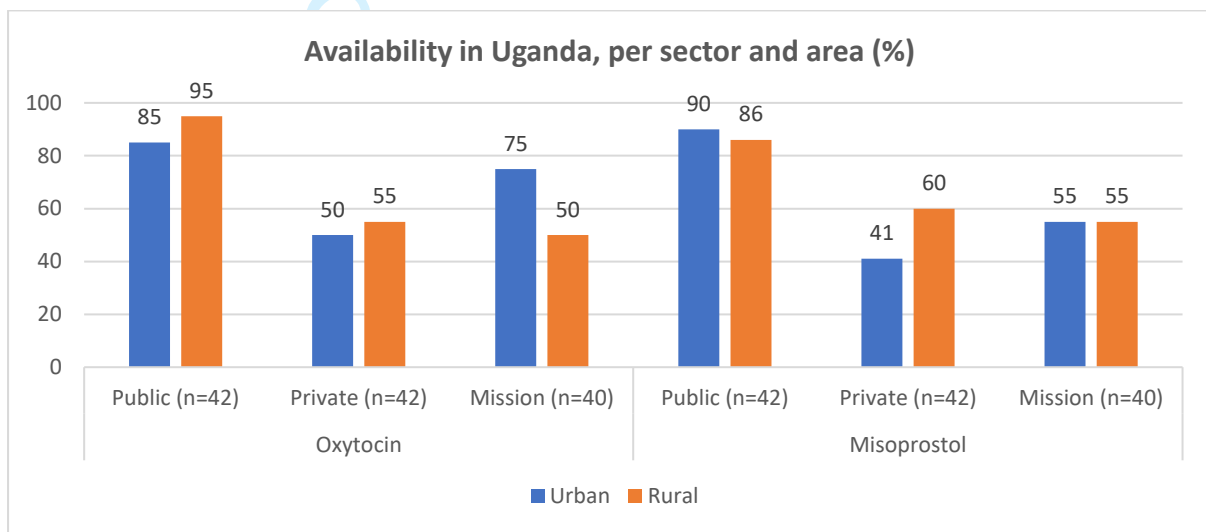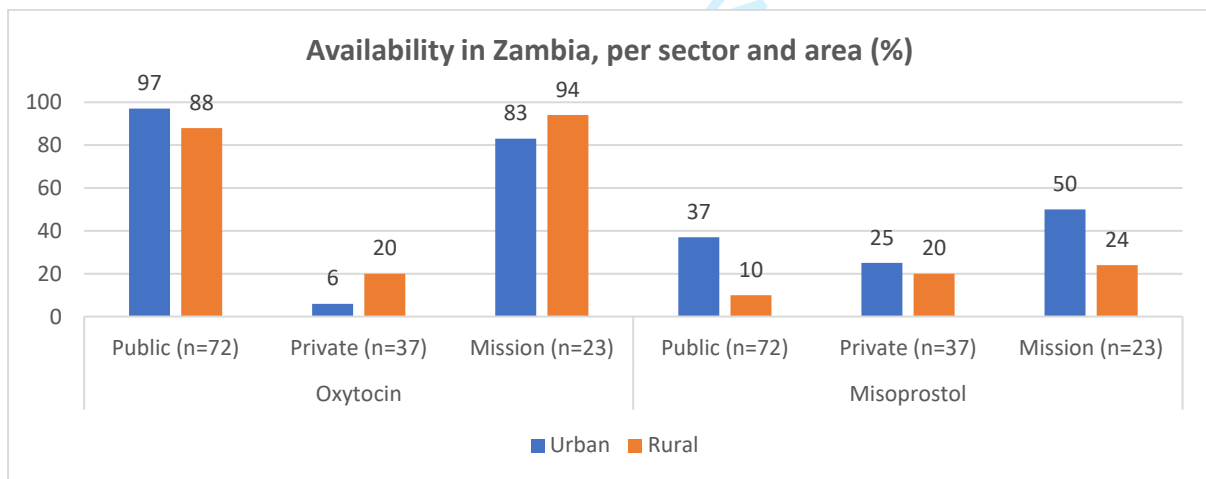

Figure 2: Availability of oxytocin and misoprostol in urban and rural facilities across countries

# BMJ Open

**Access to oxytocin and misoprostol for management of post-partum haemorrhage in Kenya, Uganda and Zambia: a cross-sectional assessment of availability, prices and affordability.**

|                                 |                                                                                                                                                                                                                                                                                                                                                                                                                                                                                                                                                                                                                                                                                                                                                                                                                                     |
|---------------------------------|-------------------------------------------------------------------------------------------------------------------------------------------------------------------------------------------------------------------------------------------------------------------------------------------------------------------------------------------------------------------------------------------------------------------------------------------------------------------------------------------------------------------------------------------------------------------------------------------------------------------------------------------------------------------------------------------------------------------------------------------------------------------------------------------------------------------------------------|
| Journal:                        | <i>BMJ Open</i>                                                                                                                                                                                                                                                                                                                                                                                                                                                                                                                                                                                                                                                                                                                                                                                                                     |
| Manuscript ID                   | bmjopen-2020-042948.R2                                                                                                                                                                                                                                                                                                                                                                                                                                                                                                                                                                                                                                                                                                                                                                                                              |
| Article Type:                   | Original research                                                                                                                                                                                                                                                                                                                                                                                                                                                                                                                                                                                                                                                                                                                                                                                                                   |
| Date Submitted by the Author:   | 09-Dec-2020                                                                                                                                                                                                                                                                                                                                                                                                                                                                                                                                                                                                                                                                                                                                                                                                                         |
| Complete List of Authors:       | Kibira, Denis; Utrecht University, Utrecht Centre for Pharmaceutical Policy and Regulation, Division of Pharmacoepidemiology and Clinical Pharmacology; Coalition for Health Promotion and Social Development (HEPS-Uganda)<br>Ooms , Gaby; Health Action International<br>van den Ham, Hendrika; Utrecht University Utrecht Institute for Pharmaceutical Sciences, WHO Collaborating Centre for Pharmaceutical Policy and Regulation, Division of Pharmacoepidemiology and Clinical Pharmacology<br>Namugambe-Kitutu, Juliet ; Mbarara University of Science and Technology, Department of Pharmacy<br>Reed, Tim; Health Action International<br>Leufkens, Hubert; Utrecht University, Utrecht Institute for Pharmaceutical Sciences<br>Mantel-Teeuwisse, Aukje; Utrecht University, Utrecht Institute for Pharmaceutical Sciences |
| <b>Primary Subject Heading</b>: | Reproductive medicine                                                                                                                                                                                                                                                                                                                                                                                                                                                                                                                                                                                                                                                                                                                                                                                                               |
| Secondary Subject Heading:      | Health policy, Global health, Obstetrics and gynaecology                                                                                                                                                                                                                                                                                                                                                                                                                                                                                                                                                                                                                                                                                                                                                                            |
| Keywords:                       | Health policy < HEALTH SERVICES ADMINISTRATION & MANAGEMENT, Maternal medicine < OBSTETRICS, REPRODUCTIVE MEDICINE                                                                                                                                                                                                                                                                                                                                                                                                                                                                                                                                                                                                                                                                                                                  |
|                                 |                                                                                                                                                                                                                                                                                                                                                                                                                                                                                                                                                                                                                                                                                                                                                                                                                                     |

SCHOLARONE™  
Manuscripts



I, the Submitting Author has the right to grant and does grant on behalf of all authors of the Work (as defined in the below author licence), an exclusive licence and/or a non-exclusive licence for contributions from authors who are: i) UK Crown employees; ii) where BMJ has agreed a CC-BY licence shall apply, and/or iii) in accordance with the terms applicable for US Federal Government officers or employees acting as part of their official duties; on a worldwide, perpetual, irrevocable, royalty-free basis to BMJ Publishing Group Ltd ("BMJ") its licensees and where the relevant Journal is co-owned by BMJ to the co-owners of the Journal, to publish the Work in this journal and any other BMJ products and to exploit all rights, as set out in our [licence](#).

The Submitting Author accepts and understands that any supply made under these terms is made by BMJ to the Submitting Author unless you are acting as an employee on behalf of your employer or a postgraduate student of an affiliated institution which is paying any applicable article publishing charge ("APC") for Open Access articles. Where the Submitting Author wishes to make the Work available on an Open Access basis (and intends to pay the relevant APC), the terms of reuse of such Open Access shall be governed by a Creative Commons licence – details of these licences and which [Creative Commons](#) licence will apply to this Work are set out in our licence referred to above.

Other than as permitted in any relevant BMJ Author's Self Archiving Policies, I confirm this Work has not been accepted for publication elsewhere, is not being considered for publication elsewhere and does not duplicate material already published. I confirm all authors consent to publication of this Work and authorise the granting of this licence.

1  
2  
3  
4 1 **Access to oxytocin and misoprostol for management of post-partum haemorrhage in Kenya,**  
5 2 **Uganda and Zambia. A cross-sectional assessment of availability, prices and affordability.**

6  
7 3 **Authors**

8 4 Denis Kibira<sup>1,2</sup>, Gaby Isabelle Ooms<sup>1,3</sup>, Hendrika A. van den Ham<sup>1</sup>, Juliet Sanyu Namugambe<sup>4</sup>, Tim Reed<sup>3</sup>,  
9 5 Hubert G. Leufkens<sup>1</sup>, Aukje K. Mantel-Teeuwisse<sup>1</sup>

10  
11 6  
12 7 **Affiliations**

13 8 <sup>1</sup> Utrecht Centre for Pharmaceutical Policy and Regulation

14 9 Utrecht Institute for Pharmaceutical Sciences

15 10 Utrecht University

16 11 Universiteitsweg 99

17 12 3584 CG Utrecht, the Netherlands

18 13 <sup>2</sup> Coalition for Health Promotion and Social Development (HEPS-Uganda)

19 14 Plot 351A, Balintuma Road, Namirembe Hill

20 15 <sup>3</sup> Health Action International

21 16 Overtoom 60 (2)

22 17 1054 HK Amsterdam, The Netherlands

23 18 <sup>4</sup> Department of Pharmacy, Mbarara University of Science and Technology

24 19 Mbarara, Uganda

25  
26 20  
27 21 **Authors email list**

28 22 DK: [dkibira@gmail.com/dkibira@heps.or.ug](mailto:dkibira@gmail.com/dkibira@heps.or.ug)

29 23 GIO: [Gaby@haiweb.org](mailto:Gaby@haiweb.org)

30 24 HDH: [H.A.vandenHam@uu.nl](mailto:H.A.vandenHam@uu.nl)

31 25 JN: [julietsanyu@gmail.com](mailto:julietsanyu@gmail.com)

32 26 TR: [Tim@haiweb.org](mailto:Tim@haiweb.org)

33 27 HL: [H.G.M.Leufkens@uu.nl](mailto:H.G.M.Leufkens@uu.nl)

34 28 AM: [a.k.mantel@uu.nl](mailto:a.k.mantel@uu.nl)

35  
36 29  
37 30 **Corresponding author**

38 31 Denis Kibira, MBA

39 32 WHO Collaborating Centre for Pharmaceutical Policy and Regulation

40 33 Utrecht University

41 34 Utrecht Institute for Pharmaceutical Sciences

42 35 Universiteitsweg 99

43 36 3584 CG Utrecht, the Netherlands

44 37 Coalition for Health Promotion and Social Development (HEPS-Uganda)

45 38 Plot 351A, Balintuma Road, Namirembe Hill, Kampala, Uganda

46 39 Email: [dkibira@gmail.com/dkibira@heps.or.ug](mailto:dkibira@gmail.com/dkibira@heps.or.ug)

47 40 Tel: +256701580120

48 41 Abstract word count: 283

49 42 Manuscript word count (excluding tables, figures and references): 3373

50 43 Number of tables and figures: 3

51 44  
52 45 **Key words:** Access, Oxytocin, Misoprostol, Post-partum haemorrhage

1  
2  
3 46 **Abstract**

4  
5 47 **Objective**

6  
7 48 To assess access (availability and affordability) to oxytocin and misoprostol at health facilities in  
8  
9 49 Kenya, Uganda and Zambia to improve prevention and management of postpartum haemorrhage  
10  
11 50 (PPH).

12 51  
13  
14 52 **Design**

15  
16 53 The assessment was undertaken using data from Health Action International (HAI) research on  
17  
18 54 sexual and reproductive health commodities based on a cross-sectional design adapted from the  
19  
20 55 standardized WHO/HAI methodology.

21 56  
22  
23 57 **Setting**

24  
25 58 Data was collected from 376 health facilities in in Kenya, Uganda and Zambia in July and August  
26  
27 59 2017.

28  
29 60  
30  
31 61 **Outcome measures**

32  
33 62 Availability was calculated as mean percentage of sampled medicine outlets where medicine was  
34  
35 63 found on the day of data collection. Medicine prices were compared to international reference  
36  
37 64 prices (IRP) and expressed as median price ratios (MPRs). Affordability was calculated using  
38  
39 65 number of days required to pay for a standard treatment based on the daily income of the lowest-  
40  
41 66 paid government worker.

42 67  
43  
44 68 **Results**

45  
46 69 Availability of either oxytocin or misoprostol at health facilities was high; 81% in Kenya, 82% in  
47  
48 70 Uganda, and 76% in Zambia. Oxytocin was more available than misoprostol, and it was most  
49  
50 71 available in the public sector in the three countries. Availability of misoprostol was highest in the  
51  
52 72 public sector in Uganda (88%). Oxytocin and misoprostol were purchased by patients at prices  
53  
54 73 above IRP, but both medicines cost less than a day's wages and were therefore affordable.

1  
2  
3 74 Availability of misoprostol was poor in rural settings where it would be more preferred due to  
4  
5 75 lack of trained personnel and cold storage facilities required for oxytocin.  
6  
7  
8 76

9  
10 77 **Conclusion**

11  
12 78 Availability and affordability of either oxytocin or misoprostol at health facilities met the WHO  
13  
14 79 benchmark of 80%. However, countries with limited resources should explore mechanisms to  
15  
16 80 optimize management of PPH by improving access to misoprostol especially in rural areas.  
17  
18 81

19 82 **Strengths and limitations of this study**

- 20  
21  
22 83 • The WHO/HAI methodology that was used for this study is tested, reliable, standardized  
23  
24 84 and validated for the measurement of medicine prices and availability.  
25  
26 85 • The study provides details on availability, price, and affordability of individual medicines  
27  
28 86 across three sectors (public, private and mission).  
29  
30 87 • The methodology uses a cross-sectional design and therefore historical data trends were  
31  
32 88 not traced.  
33  
34 89 • The study only used two frontline medicines for PPH, while countries may have had  
35  
36 90 other alternative therapies including carbetocin which were not captured.  
37  
38 91 • In Zambia we surveyed 23 mission facilities which was below the 30 facilities per sector  
39  
40 92 30 recommended by the methodology.  
41  
42 93



## 95 **Background**

96 The risk of women dying due to pregnancy and childbirth remains a major global health challenge.  
97 In 2017 there were approximately 295,000 maternal deaths globally, of which 94% occurred in  
98 low-and middle-income countries (LMICs). Sub-Saharan Africa contributed about 66% to these  
99 deaths [1]. The global leading cause of maternal mortality is haemorrhage, accounting for 27% of  
100 all maternal deaths [2].

101 Postpartum haemorrhage (PPH) which occurs after childbirth accounts for most (72%) of the  
102 three forms of haemorrhage. Antepartum haemorrhage which occurs during pregnancy accounts  
103 for 24% while intrapartum haemorrhage (during childbirth) accounts for three percent [2]. PPH  
104 is responsible for 34% of maternal deaths in Kenya, 25% in Uganda and 34% in Zambia [3-5].

105 The World Health Organization (WHO) recommends oxytocin as the medicine of choice for  
106 management of PPH, and misoprostol as the second line alternative when injection capability is  
107 lacking and/or storage conditions for oxytocin are not met. Other uterotonics such as  
108 ergometrine and carbetocin are also recommended when use of oxytocin is not feasible [1].

109 The relevance of oxytocin and misoprostol to health systems was further emphasised by the  
110 United Nations Commission on Life-saving Commodities for women and children when they were  
111 listed among the 13 lifesaving, low-cost medicines with greatest proven potential to avert  
112 preventable deaths [6]. Both oxytocin and misoprostol are included in national essential  
113 medicine lists in Kenya, Uganda and Zambia [7-9].

114  
115 The quality, efficacy and safety of oxytocin and misoprostol have been widely studied [10-23].  
116 Oxytocin is temperature sensitive and should therefore be stored under refrigeration at  
117 temperatures between 2 and 8°C to prevent degradation expected at higher temperatures[10].  
118 Degradation reduces potency and consequently the effectiveness of the medicine. Oxytocin  
119 stability through the supply chain has proven a worry to policy makers and has been a subject of  
120 numerous investigations to ascertain quality and efficacy [11-13]. Some studies on the quality of

1  
2  
3 121 oxytocin found analyzed samples to contain less active pharmaceutical ingredients than was  
4  
5 122 claimed in the label, while some samples also failed sterility tests [14-16]. LMICs with low  
6  
7 123 resources may also lack facilities required for adequate storage conditions for oxytocin to ensure  
8  
9 124 integrity of the product, while they may also lack trained health workers for its administration  
10  
11 125 [17]. Women living among displaced populations, in conflict areas, hard to reach areas, who  
12  
13 126 deliver at home or with a traditional birth attendant seldom have access to a trained health  
14  
15 127 worker. Hence, they do not have access to oxytocin or if they do, it is not safely used [24]. As a  
16  
17 128 result of these challenges, prevention and treatment of PPH in low-resource settings using  
18  
19 129 oxytocin has not provided the desired impact [18, 19].  
20

21  
22 131 Misoprostol, a prostaglandin, is an alternative to oxytocin in the management of PPH. It is cheap,  
23  
24 132 stable at room temperature and more convenient to administer. It can be administered  
25  
26 133 sublingually, orally and vaginally [19, 20, 25, 26]. It has been demonstrated through various  
27  
28 134 studies that use of misoprostol is feasible, improves uterotonic coverage, reduces incidence of  
29  
30 135 PPH and that it is effective for use at community and household level in low-resource settings  
31  
32 136 [20-22].  
33

34 137 In 2015, the WHO expert committee on the selection and use of medicines recommended the  
35  
36 138 addition of misoprostol for the prevention and treatment of postpartum haemorrhage when  
37  
38 139 oxytocin is not available or cannot be used safely [23]. At different occasions the inclusion of  
39  
40 140 misoprostol in the list of WHO recommended medicines was debated for both efficacy and safety  
41  
42 141 reasons, but the 2015 decision to recommend misoprostol in addition to oxytocin for prevention  
43  
44 142 of PPH was reaffirmed in 2019 by a WHO expert committee [27]. Before 2015 misoprostol was  
45  
46 143 indicated by WHO for use in induction of labour and management of spontaneous and induced  
47  
48 144 abortion [28]. The historical use of misoprostol for termination of pregnancies may have affected  
49  
50 145 its acceptability for routine use in prevention of PPH, despite available convincing evidence of its  
51  
52 146 therapeutic effect and relative safety in management of PPH. Another challenge is that the high  
53  
54 147 doses of misoprostol required for post-partum haemorrhage often result in troublesome side  
55  
56 148 effects such as vomiting and shivering [29]. Further, the longer half-life of the medicine means  
57  
58 149 that it stays longer in the body and has potential to cause complications [30].  
59

1  
2  
3 150 These two medicines could be used complementarily to overcome challenges and barriers in  
4  
5 151 policy, health sector infrastructure and health service delivery that at the moment inhibit the  
6  
7 152 optimal management of PPH [24, 31]. However, there is a knowledge gap on the accessibility of  
8  
9 153 both medicines in low-resource settings. This is a missed opportunity in closing the gap in the  
10  
11 154 reduction of maternal mortality in developing countries. This paper therefore assesses access to  
12  
13 155 oxytocin and misoprostol in urban and rural health facilities in Kenya, Uganda and Zambia  
14  
15 156 through a cross-sectional assessment of availability, prices and affordability at the patient level  
16  
17 157 of the two medicines to facilitate the optimal management of PPH.  
18  
19 158

## 21 159 **Methods**

22  
23  
24 160 A secondary assessment of availability and prices of oxytocin and misoprostol was undertaken  
25  
26 161 using data from Health Action International (HAI) research on sexual and reproductive health  
27  
28 162 commodities (*SRHC: Measuring Prices, Availability & Affordability* [32]. The data was collected  
29  
30 163 in Kenya, Uganda and Zambia in July and August 2017 using a cross-sectional design with  
31  
32 164 quantitative methods adapted from the standardized WHO/HAI methodology [33], which has  
33  
34 165 been validated [34] and used extensively in several countries [35-37].  
35  
36 166

### 37 166 38 167 *Patient and Public Involvement*

39  
40  
41 168 The research agenda for this study was set by the multi-stakeholder platform Medicines  
42  
43 169 Transparency Alliance (MeTA) Councils in Kenya, Uganda and Zambia. The study protocols were  
44  
45 170 reviewed and approved by MeTA Councils. Data collectors were selected from the membership  
46  
47 171 of MeTA within the countries. Results were validated by stakeholders including civil society.  
48  
49 172 Dissemination plans were made by MeTA councils and results were disseminated to wide country  
50  
51 173 and inter-country platforms including Ministries of Health, Parliamentarians, private sector as  
52  
53 174 well as civil society members to inform policy.  
54  
55 175

1  
2  
3 176 *Data collection*  
4

5 177 For this study, the data on availability, price and affordability of the highest and lowest-priced  
6  
7 178 products of oxytocin 10IU, 1ml injections and misoprostol 200 µg tablets were extracted.

8  
9 179 In each of the three countries, six geographical areas (districts, municipalities or counties) were  
10  
11 180 selected; the country's main urban centre and five other areas which were randomly selected.

12 181 All survey areas were reachable within one day's travel from the country's main urban centre  
13  
14 182 using a car or bus. Each survey area covered a population of between 100 000 and 250 000  
15  
16 183 people.  
17

18 184

19  
20 185 The WHO/HAI methodology prescribes a minimum of 30 health facilities from each of the sectors,  
21  
22 186 i.e. public, private and mission sectors, giving a minimum total of 90 facilities per country [33]. In  
23  
24 187 each survey area, the main public hospital was selected first. Then, eight public health facilities,  
25  
26 188 four each from urban and rural areas, representing levels of care at which SRHCs should be made  
27  
28 189 available, were randomly selected [38]. Additionally, eight private (for profit) and eight mission  
29  
30 190 sector (not for profit) health facilities (four each from urban and rural areas) that were within a  
31  
32 191 three-hour drive radius of the main hospitals were selected. Thus, a total of 24 health facilities  
33  
34 192 were sampled from each of the six survey areas in Kenya, Uganda and Zambia, respectively, giving  
35  
36 193 a total of 144 facilities per country.  
37

38 194  
39 195 Eight data collectors with experience of conducting medicine surveys worked in pairs of a  
40  
41 196 pharmacist and a social scientist under close supervision of a qualified survey manager. Prior to  
42  
43 197 data collection, the team was trained on the methodology. Data collectors used a semi-  
44  
45 198 structured questionnaire administered to facility managers while physically ascertaining the  
46  
47 199 availability of surveyed medicines. Availability was measured by the physical presence of a  
48  
49 200 product in the outlet at the time of the survey. For each medicine surveyed, data collectors  
50  
51 201 recorded the product name for both the highest and lowest-priced medicines available, the  
52  
53 202 manufacturer and unit price of the product. In the public sector in Uganda and Zambia where  
54  
55 203 medicines are free of charge to care seekers, prices were not recorded.  
56  
57 204

1  
2  
3 205 Once data collection was complete, survey data was entered into a pre-programmed Microsoft  
4  
5 206 Excel Workbook provided as part of the modified methodology. Data input was independently  
6  
7 207 checked for errors. Additional quality control measures were executed at various stages  
8  
9 208 throughout the study by a survey manager. The survey tools were pre-tested in Uganda in 2016  
10  
11 209 and a field test was conducted by all data collectors prior to data collection. Each data collection  
12  
13 210 team had a supervisor who cross checked the data on a daily basis for completeness, legibility  
14  
15 211 and consistency and reported to the survey manager. Prior to data entry all relayed data was  
16  
17 212 checked for completeness and consistency.  
18  
19 213

#### 20 214 *Data analysis*

21  
22  
23 215 The availability of oxytocin and misoprostol was calculated as the percentage of sampled  
24  
25 216 medicine outlets where the medicine was found. Availability was also calculated for the presence  
26  
27 217 of either oxytocin or misoprostol at a facility. Data were reported in aggregate as public, private  
28  
29 218 or mission sector medicine outlets. Overall availability per sector was calculated as mean of the  
30  
31 219 two medicines surveyed.  
32  
33

34 220  
35  
36 221 Patient prices were collected in local currency including Shillings in Uganda and Kenya, and  
37  
38 222 Kwacha in Zambia. The mean, minimum and maximum unit prices were calculated. To facilitate  
39  
40 223 cross-country comparisons, medicine prices obtained during the survey were expressed as ratios  
41  
42 224 relative to a standard set of international reference prices by dividing the mean unit price (in  
43  
44 225 dollars) by the Management Sciences for Health international buyers' reference unit price  
45  
46 226 derived on September 25<sup>th</sup> 2018 [39]. Mean price ratios (MPRs) were only calculated for oxytocin  
47  
48 227 and misoprostol products that had price data from at least four medicine outlets per sector [33].  
49  
50 228 The exchange rate used to calculate MPRs was 1 USD = 102.67 Kenya Shillings (KES), 1 USD =  
51  
52 229 3667.9 Uganda Shillings (UGX), 1 USD = 8.85 Zambia Kwacha (ZMW) taken on 1<sup>st</sup> July, 2017 prior  
53  
54 230 to the first day of data collection [40, 41].  
55

56 231  
57  
58  
59  
60

1  
2  
3 232 Affordability was calculated using the number of days' wages it requires to pay for standard  
4  
5 233 treatment or dose of treatment based on the daily income of the lowest-paid government worker  
6  
7 234 (LPGW) [33]. The daily wage of a LPGW is approximately KES 411 (USD 4) in Kenya, 6255 UGX  
8  
9 235 (USD 1.78) in Uganda, and ZMW 96.7 (USD 10.92) in Zambia, as per public service salary  
10  
11 236 structures [42]. Treatments that required more than one day's wages to purchase were  
12  
13 237 considered unaffordable [33].  
14

15 238

## 18 239 **Results**

20 240 A total of 376 health facilities, including 120, 124 and 132 health facilities in Kenya, Uganda and  
21  
22 241 Zambia, respectively, were surveyed as shown in figure 1 and 2.  
23  
24

25 242

### 28 243 *Availability across sectors*

30 244 Figure 1 shows the availability of either oxytocin or misoprostol at the surveyed health facilities  
31  
32 245 in the three countries. Overall availability of either oxytocin or misoprostol met the WHO  
33  
34 246 benchmark of 80% in Kenya (81%) and Uganda (82%) but was marginally lower in Zambia (76%).  
35  
36 247 Availability of oxytocin was higher than misoprostol except in Uganda. Availability of either  
37  
38 248 oxytocin or misoprostol was comparable between the public and mission sectors.  
39

40 249

42 250 In the public sector, the three countries met the WHO benchmark for availability of oxytocin.  
43  
44 251 Misoprostol was only optimally available in the public sector in Uganda (88%), with availability in  
45  
46 252 Kenya and Zambia lower (36% and 21%, respectively). In the private sector, none of the countries  
47  
48 253 met the WHO recommended availability for misoprostol. Availability in Zambia was especially  
49  
50 254 low (24%).  
51

52 255

55 256

1  
2  
3 257 *Availability in urban versus rural areas*  
4  
5

6 258 Figure 2 shows availability in urban versus rural areas. Oxytocin was available in over 80% of all  
7  
8 259 public urban and rural facilities across the three countries. Optimum availability of 80% was  
9  
10 260 further achieved for oxytocin in Kenya mission urban facilities (89%) and in Zambia's mission  
11  
12 261 sector for both urban and rural facilities (83% and 94%, respectively). Optimum availability of  
13  
14 262 misoprostol was only achieved in Ugandan public urban and rural facilities (90% and 86%,  
15  
16 263 respectively).  
17

18 264  
19  
20

21 265 In Kenya, oxytocin had a higher availability than misoprostol across all urban and rural facilities  
22  
23 266 in the three sectors. Availability of misoprostol was lowest in the public sector: availability in  
24  
25 267 urban facilities was 45%, and 27% in rural facilities. In the private sector, there was a higher  
26  
27 268 availability in rural facilities than in urban facilities for both oxytocin and misoprostol.  
28

29 269  
30  
31

32 270 In Uganda, the public sector was optimally stocked with both oxytocin and misoprostol across  
33  
34 271 urban and rural facilities. Rural public facilities had a higher availability of oxytocin than urban  
35  
36 272 public facilities. In the private sector, rural facilities also had a higher availability of oxytocin and  
37  
38 273 misoprostol compared to urban facilities.  
39

40 274  
41  
42

43 275 Oxytocin had a high availability in Zambia's public and mission sectors across both urban and  
44  
45 276 rural facilities. Availability in the private sector was very low. Availability of misoprostol was low  
46  
47 277 across the sectors and areas, with highest availability found in urban mission facilities (50%).  
48  
49 278 Although both oxytocin and misoprostol were poorly available in the private sector, oxytocin was  
50  
51 279 more available in rural than urban facilities, while misoprostol had a higher availability in urban  
52  
53 280 facilities than in rural facilities.  
54

55 281  
56  
57  
58  
59  
60

1  
2  
3 282 *Prices and affordability*  
4  
5

6 283 Oxytocin and misoprostol were free for patients in the public and mission sectors in Zambia, and  
7  
8 284 in the public sector in Uganda. In Kenya's public sector, the lowest price was noted for oxytocin,  
9  
10 285 with a median price ratio (MPR) of USD 0.174 (Table 1). Both misoprostol and oxytocin cost less  
11  
12 286 than a day's wages for a LPGW across all countries and sectors, and can therefore be considered  
13  
14 287 affordable.  
15

16 288  
17  
18  
19 289 Notwithstanding the sectors in which the medicines were for free, the MPRs for oxytocin and  
20  
21 290 misoprostol were above one in the countries, ranging from 1.37 for misoprostol in Kenya's public  
22  
23 291 sector to 29.95 for misoprostol in the private sector in Zambia. This meant that both misoprostol  
24  
25 292 and oxytocin were accessed by patients at prices that were more expensive compared to  
26  
27 293 international reference prices.  
28  
29  
30  
31  
32  
33  
34  
35  
36  
37  
38  
39  
40  
41  
42  
43  
44  
45  
46  
47  
48  
49  
50  
51  
52  
53  
54  
55  
56  
57  
58  
59  
60



1  
2  
3  
4  
5  
6  
7  
8  
9  
10  
11  
12  
13  
14  
15  
16  
17  
18  
19  
20  
21  
22  
23  
24  
25  
26  
27  
28  
29  
30  
31  
32  
33  
34  
35  
36  
37  
38  
39  
40  
41  
42  
43  
44  
45  
46  
47

**Table 1: Prices and affordability of misoprostol and oxytocin across countries**

|               |             | Public      |                  |                                                    | Private     |                   |                                                    | Mission     |                  |                                                    |
|---------------|-------------|-------------|------------------|----------------------------------------------------|-------------|-------------------|----------------------------------------------------|-------------|------------------|----------------------------------------------------|
|               |             | Price (USD) | Mean Price Ratio | Affordability of treatment (number of day's wages) | Price (USD) | Mean Price Ratio* | Affordability of treatment (number of day's wages) | Price (USD) | Mean Price Ratio | Affordability of treatment (number of day's wages) |
| <b>Kenya</b>  | Oxytocin    | 0.029       | 0.17             | 0.01                                               | 1.354       | 8.14              | 0.34                                               | 0.672       | 4.04             | 0.30                                               |
|               | Misoprostol | 0.273       | 1.37             | 0.07                                               | 1.967       | 9.84              | 0.49                                               | 1.217       | 6.09             | 0.17                                               |
|               |             |             |                  |                                                    |             |                   |                                                    |             |                  |                                                    |
| <b>Uganda</b> | Oxytocin    | 0           | NA               | NA                                                 | 0.998       | 5.99              | 0.57                                               | 0.408       | 2.45             | 0.23                                               |
|               | Misoprostol | 0           | NA               | NA                                                 | 0.589       | 2.95              | 0.34                                               | 0.39        | 1.95             | 0.22                                               |
|               |             |             |                  |                                                    |             |                   |                                                    |             |                  |                                                    |
| <b>Zambia</b> | Oxytocin    | 0           | NA               | NA                                                 | 0.678       | 4.08              | 0.06                                               | NA          | NA               | NA                                                 |
|               | Misoprostol | 0           | NA               | NA                                                 | 5.989       | 29.95             | 0.55                                               | NA          | NA               | NA                                                 |

NA=not applicable, USD=United States Dollar

## 294 Discussion

295 This paper assesses access to oxytocin and misoprostol in urban and rural health facilities in  
296 Kenya, Uganda and Zambia through a cross-sectional assessment of availability, prices and  
297 affordability at the patient level of the two medicines to facilitate the optimal management of  
298 PPH.

299  
300 Overall, availability of uterotonics, expressed as the presence of either oxytocin or misoprostol,  
301 was high in Kenya and Uganda, and just below the WHO benchmark of 80% in Zambia.  
302 Misoprostol was markedly less available than oxytocin. Oxytocin and misoprostol were accessed  
303 by patients in the private sector at prices that were more expensive than the international  
304 reference prices. However, both medicines cost less than a day's wages, which is considered  
305 affordable. The availability of misoprostol across urban and rural areas did not show the expected  
306 pattern of having a higher availability of the medicine in rural areas, which are more prone to  
307 health system barriers for use of oxytocin.

308  
309 Oxytocin availability was high in the public and mission sectors but lower in the private sector,  
310 particularly in Zambia. In the private sector, none of the countries met the WHO availability  
311 benchmark of 80% for the two medicines. Besides the public sector in Uganda, misoprostol was  
312 not optimally available in the other countries or sectors. Misoprostol had a low availability,  
313 particularly in rural areas where the medicine ought to play a major role given that facilities in  
314 these areas tend to lack adequately trained health workers and the health infrastructure required  
315 to maintain cold chain to safeguard the quality of oxytocin [17]. Its poor availability in Kenya and  
316 Zambia may be a result of slow diffusion of the intervention into the health system [43, 44].  
317 Moreover, misoprostol has been recommended by WHO for use in PPH since 2015 after several  
318 rounds of weighing the benefits and risks, but the debate about its role in PPH prevention has  
319 continued over the years [23, 27]. The fear and stigma amongst health workers about the use of  
320 misoprostol to induce abortions may also have contributed to the situation [29]. In contrast,  
321 Uganda's efforts as an early adaptor [43, 44] to ensure availability of misoprostol through  
322 government procurement and community level distribution strategies may explain why it has a

323 higher availability of misoprostol, as well as lower PPH levels compared to Kenya and Zambia  
324 (25% in Uganda versus 34% in both Kenya and Zambia) [3-5].

325  
326 Urban facilities have better health infrastructure such as cold chain facilities, and also tend to  
327 have more health workers compared to rural facilities [45-47]. It would therefore be expected  
328 that these urban areas would have a higher availability of oxytocin and lower availability of  
329 misoprostol than rural facilities. However, there were instances when rural facilities had a higher  
330 availability of oxytocin and a lower availability of misoprostol. This may indicate that stocking of  
331 oxytocin and misoprostol by health facilities does not take into consideration challenges faced  
332 by the facilities to administer the medicines. It will require more research in this area to better  
333 understand the data and for policy makers to look into how to address context-specific barriers  
334 related to these medicines by ensuring that they are deployed where they can have maximum  
335 impact [48, 49]. For example, efforts should be made to deploy more misoprostol in rural areas  
336 where there is a lack of adequately trained personnel and a lack of health infrastructure to  
337 properly use oxytocin, and to ensure that both medicines are available to complement one  
338 another depending on circumstances.

339  
340 PPH levels across the countries are high despite health facilities having reached the WHO  
341 benchmark for availability of either oxytocin or misoprostol across the three countries. This may  
342 confirm the finding from a study by Ononge et al that despite use of uterotonics, incidence of  
343 PPH remains high [5]. It may be that some oxytocin found at health facilities may not have the  
344 quality and efficacy for optimum management of PPH [14-16]. Countries should strive for  
345 universal access as the 80% availability benchmark by WHO still leaves one in five facilities  
346 without required medicine. However, availability of a medicine alone does not guarantee that it  
347 is used, health worker beliefs and knowledge as well as necessary infrastructure such as  
348 electricity and equipment are needed to reduce PPH levels.

349  
350 Studies have shown that combinations of uterotonics have proven to be more effective. For  
351 example, a misoprostol plus oxytocin combination was found to be more effective in preventing

1  
2  
3 352 PPH than the currently used standard of oxytocin only [50]. This argument further emphasizes  
4  
5 353 that having both oxytocin and misoprostol available at the health facility could help to improve  
6  
7 354 PPH management.  
8

9  
10 355 Although oxytocin and misoprostol were affordable to patients, the private sector prices were  
11  
12 356 varied and more expensive compared to IRPs. For example, the MPR of misoprostol ranged from  
13  
14 357 1.37 in Kenya to 29.95 in Zambia. Therefore, even though availability met the WHO benchmark,  
15  
16 358 individual patients may still be confronted with unavailability in the public sector, pushing them  
17  
18 359 to seek care in the private sector where they may not be able to afford the prices of medicines.  
19  
20 360 This suggests that countries need to explore pricing policies to improve affordability of the  
21  
22 361 medicines.  
23

24 362  
25 363 The WHO/HAI methodology that was used for this study is tested, reliable, standardized and  
26  
27 364 validated for the measurement of medicine prices and availability [34]. The study provides details  
28  
29 365 on availability, price, and affordability of individual medicines across three sectors (public, private  
30  
31 366 and mission). The methodology uses a cross-sectional design and therefore historical data trends  
32  
33 367 were not traced. The study only used two frontline medicines for PPH, while countries may have  
34  
35 368 had other alternative therapies including carbetocin which were not captured. The number of  
36  
37 369 mission facilities surveyed in Zambia (23) was below the minimum (30) recommended for the  
38  
39 370 methodology per sector [33]. The findings presented here may not be used to predict country  
40  
41 371 pharmaceutical supply chain but are intended to stimulate policy discussions on deliberate  
42  
43 372 targeting and the use of available technologies to improve access.  
44

45 373

## 46 374 **Conclusion**

47 375 Availability of oxytocin and misoprostol met the WHO benchmark in Kenya and Uganda but was  
48  
49 376 just below the WHO benchmark in Zambia. In general, oxytocin was more available than  
50  
51 377 misoprostol. Oxytocin and misoprostol were purchased by patients at prices above international  
52  
53 378 reference prices but both medicines cost less than a day's wages for a LPGW and were therefore  
54  
55 379 considered affordable. However, there was no strategy in place that looked at which medicine  
56  
57 380 could be best utilized in which area. Countries with limited resources should explore mechanisms

1  
2  
3 381 to balance access to both oxytocin and misoprostol between rural and urban areas to optimize  
4  
5 382 management of PPH.  
6  
7

8 383 **List of abbreviations**

9  
10 384 Post-partum haemorrhage (PPH); Median price ratio (MPR); Low- and middle-income countries  
11  
12 385 (LMICs); Lowest-paid government worker (LPGW); sexual and reproductive health commodities  
13  
14 386 (SRHC); Health Action International (HAI); World Health Organisation (WHO).  
15

16 387

17  
18 388 **Declarations**

19  
20  
21 389 *Ethical approval and consent to participate*

22  
23  
24 390 This study did not involve human subjects and did not involve direct interaction with patients and  
25  
26 391 therefore ethical approval was not sought. However, Ministries of Health in Uganda and Zambia  
27  
28 392 and Country Directors of Health in Kenya gave approval and provided introduction letters to  
29  
30 393 health facilities.  
31

32 394

33  
34  
35 395 *Consent for publication*

36  
37  
38 396 Not applicable  
39  
40

41 397

42  
43  
44 398 *Availability of data and materials*

45  
46 399 The datasets used and/or analysed during the current study are available from the corresponding  
47  
48 400 author on request.  
49

50  
51 401

52  
53  
54 402 *Competing interests*

55  
56 403 All authors declare no competing interests.  
57  
58

1  
2  
3 404  
4  
56 405 *Funding*  
78  
9 406 This research was funded by Health Action International through the Health Systems Advocacy  
10  
11 407 Partnership.  
1213  
14 408  
1516 409 *Authors' contribution*  
1718  
19 410 DK conceptualized the project, undertook data analysis and wrote the first draft of the  
20  
21 411 manuscript; GOI contributed to data analysis; GOI, HDH, JN, TR, HL and AM revised the  
22  
23 412 manuscript and critically reviewed its contents. GO contributed to data analysis. AM critically  
24  
25 413 reviewed the manuscript, provided comments and guidance on all drafts of manuscript.  
2627  
28 414  
2930 415 *Acknowledgements*  
3132 416 The authors acknowledge data collection teams in Kenya led by Dorothy Okemo, in Uganda led  
33  
34 417 by Anthony Ssebagereka and in Zambia led by Liyoka Liyoka. We appreciate Dr. Metin  
35  
36 418 Gülmezoglu for providing comments and Daphne Ssebugwawo who edited the manuscript.  
3738 419  
39  
40  
41  
42  
43  
44  
45  
46  
47  
48  
49  
50  
51  
52  
53  
54  
55  
56  
57  
58  
59  
60

## References

1. World Health Organization, *Trends in maternal mortality: 2000 to 2017: estimates by WHO, UNICEF, UNFPA, World Bank Group and the United Nations Population Division*, 2019: Geneva.
2. Say L, et al., *Global causes of maternal death; a WHO systematic analysis*. *Lancet Global Health*, 2014. **2** (6): p. E323-33.
3. PSI, *Improving Maternal Health: Preventing Post-Partum Hemorrhage in Rural Zambia*, 2014: Washington D.C.
4. Kinuthia, K., M. Stephenson, and E. Maogoto, *Management of postpartum hemorrhage in a rural hospital in Kenya: a best practice implementation project*. *JBI Database System Rev Implement Rep*, 2019. **17**(2): p. 248-258.
5. Ononge, S., et al., *Incidence and risk factors for postpartum hemorrhage in Uganda*. *Reproductive Health*, 2016. **13**(38).
6. United Nations, *United Nations Commission on Life-saving Commodities for Women and Children; Commissioner's Report 2012*, United Nations: New York.
7. Ministry of Health, *Kenya Essential Medicines List 2016*, 2016: Nairobi, Kenya.
8. Ministry of Health, *Essential Medicines and Health Supplies List of Uganda*, 2016.
9. Ministry of Health, *Zambia Essential Medicines List*, 2013.
10. World Health Organisation, *Recommendations for the prevention and treatment of postpartum haemorrhage*. , 2012, Department of Reproductive Health: Geneva.
11. De Groot, A.N., et al., *Oxytocin and desamino-oxytocin tablets are not stable under simulated tropical conditions*. *Journal of Clinical Pharmacy* 1995. **20**(2): p. 115-119.
12. Hogerzeil, H.V., et al., *Stability of essential drugs during shipment to the tropics*. *BMJ*, 1992. **304**(6821): p. 210-212.
13. Nazerali, H. and H.V. Hogerzeil, *The quality of essential drugs in rural Zimbabwe: controlled longitudinal study*. *BMJ*, 1998. **317**(7157): p. 512-13.
14. Karikari -Boateng, E., *Post-market quality surveillance project maternal health care products on the Ghanaian market*, 2013, Ghana Food and Drugs Authority: Accra.
15. Torloni, M.R., et al., *Quality of oxytocin available in low- and middle-income countries: a systemic review of the literature*. *BJOG*, 2016. **123**(13): p. 2076–86.
16. Stanton, C., et al., *Accessibility and potency of uterotonic drugs purchased by simulated clients in four districts in India*. *BMC Pregnancy and Childbirth* 2014. **14**(386 ): p. Page 2 of 12.
17. Anyakora, C., et al., *Quality medicines in maternal health: Results of Oxytocin, Misoprostol, Magnesium sulphate and Calcium Gluconate Quality Audits*. *BMC Pregnancy and Childbirth* 2018. **18**(1): p. 44.
18. Hofmeyr, G.J., S. Ferreira, and V.C. Nikodem, *Misoprostol for treating postpartum haemorrhage: a randomized controlled trial* *BMC Pregnancy and Childbirth*, 2004. **4**(16).
19. Alfirevic, A., et al., *Prevention of postpartum hemorrhage with misoprostol* *Int J Gynecol Obstet*, 2007. **99**(Suppl 2): p. 198–201.
20. Smith, J.M., et al., *Advance distribution of misoprostol for prevention of postpartum haemorrhage at home births in two districts of Liberia*. . *BMC Pregnancy and Childbirth*, 2014. **14**: p. 189.
21. McCormick, M.I., et al., *Averting maternal death and disability: Prevention of postpartum haemorrhage in low resource settings*. *International Journal of Obstetrics and Gynaecology*, 2002. **77**: p. 267-275.



- 1
- 2
- 3
- 4 22. Smith, J.M., et al., *Misoprostol for postpartum haemorrhage prevention at home birth: an*
- 5 *integrative review of global implementation experience todate.* BMC Pregnancy and Childbirth
- 6 2013. **13**(44).
- 7
- 8 23. World Health Organisation, *The selection and use of essential medicines. Report of the WHO*
- 9 *Expert Committee 2015( including the 19th WHO Model list of essential medicines and the5th*
- 10 *WHO Model list of essential medicines for children),* 2015: Geneva.
- 11
- 12 24. Tran, D.N. and L.A. Bero, *Barriers and facilitators to the quality use of essential medicines for*
- 13 *maternal health in low–resource countries: An Ishikawa framework.* J Global Health, 2015. **5**(1).
- 14
- 15 25. Caliskan, E., et al., *Oral misoprostol for third stage of labour: a randomised trial.* Obstet Gynecol,
- 16 2003. **101**(5): p. 921-8.
- 17
- 18 26. El-Refaeey, H., et al., *Use of oral misoprostol in the prevention of postpartum haemorrhage* Obstet
- 19 *Gynecol,* 1997. **104**(3): p. 336-9.
- 20
- 21 27. World Health Organization, *The Selection and Use of Essential Medicines 2019.Report of the 22nd*
- 22 *WHO Expert Committee on the Selection and Use of Essential Medicines, 1-5 April 2019,* 2019:
- 23 Geneva.
- 24
- 25 28. Tang, J., et al., *WHO recommendations for misoprostol use for obstetric and gynaecologic*
- 26 *indications.* 2013. **121**(2): p. 186-9.
- 27
- 28 29. Chong, Y.S., L.L. Su, and S. Arulkumaran, *Misoprostol: A Quarter Century of Use, Abuse, and*
- 29 *Creative Misuse. Obstetrical and Gynecological Survey.* 2004. **59**(2): p. 128-140.
- 30
- 31 30. Theunissen, F.J., L. Chinery, and V.P. Yeshita, *Current research on carbetocin and implications for*
- 32 *prevention of postpartum haemorrhage.* BMC Reproductive Health, 2018. **15**(1): p. 94.
- 33
- 34 31. Jhpiego, *Accelovate. Brief: how can we increase global utilization of oxytocin for treatment of*
- 35 *postpartum hemorrhage,* 2015, Jhpiego: Baltimore.
- 36
- 37 32. HAI, *Sexual & Reproductive Health Commodities: Measuring Prices, Availability & Affordability;*
- 38 *Methodology & Data Entry Manual* 2017: Amsterdam.
- 39
- 40 33. WHO/HAI, *Measuring medicine prices, availability, affordability and price components,* 2008:
- 41 Geneva, Switzerland.
- 42
- 43 34. Madden, J.M., et al., *Measuring medicine prices in Peru: validation of key aspects of WHO/HAI*
- 44 *survey methodology.* Rev Panam Salud Publica, 2010. **27**(4): p. 291-9.
- 45
- 46 35. Cameron, A., et al., *Switching from originator brand medicines to generic equivalents in selected*
- 47 *developing countries: how much could be saved?* Value Health, 2012. **15**(5): p. 664-73.
- 48
- 49 36. Anson, A., et al., *Availability, prices and affordability of the World Health Organization's essential*
- 50 *medicines for children in Guatemala.* Global Health, 2012. **8**: p. 22.
- 51
- 52 37. Cameron, A., et al., *Mapping the availability, price, and affordability of antiepileptic drugs in 46*
- 53 *countries.* Epilepsia, 2012. **53**(6): p. 962-9.
- 54
- 55 38. Ministry of Health Uganda, *Package of Basic Health Services for Uganda,* 1997: Kampala, Uganda.
- 56
- 57 39. Management Sciences for Health, *International Drug Price Indicator Guide 2014 Edition,* 2015,
- 58 MSH: Medford, Mass.
- 59
- 60 40. Bank of Uganda. *Exchange rates.* 2016 [cited 2016 22nd April 2016]; Available from:  
<https://www.bou.or.ug/bou/bouwebsite/ExchangeRates/>.
- 41 oanda. Available from: <https://www.oanda.com/currency/converter/>.
- 42 42. Ministry of Public Service Uganda, *New Salary Structures for Public Servants for FY 2014/15,* 2014:  
Kampala, Uganda.
- 43 43. Sharp, B.E. and S.A. Miller, *Potential for Integrating Diffusion of Innovation Principles into Life*
- 44 *Cycle Assessment of Emerging Technologies.* Environ. Sci. Technol, 2016. **50**(6): p. 2771–2781.
- 45
- 46 44. Gonzalez, L., M. Aebbersold, and C. Fenske, *Diffusion of Innovation: Faculty Barriers to Adoption.*
- 47 *Comput Inform Nurs,* 2014. **32**(5): p. 201-4.
- 48
- 49
- 50
- 51
- 52
- 53
- 54
- 55
- 56
- 57
- 58
- 59
- 60



- 1  
2  
3 45. Henning-Smith, C., et al., *Rural-Urban Differences in Medicare Quality Outcomes and the Impact*  
4 *of Risk Adjustment*. Med Care, 2017. **55**(1): p. 823-829.  
5  
6 46. Alhassan, R.K. and E. Nketiah-Amponsah, *Frontline staff motivation levels and health care quality*  
7 *in rural and urban primary health facilities: a baseline study in the Greater Accra and Western*  
8 *regions of Ghana*. 2016.  
9  
10 47. Alghanem, F. and J.M. Clements, *Narrowing performance gap between rural and urban hospitals*  
11 *for acute myocardial infarction care*. . Am J Emerg Med, 2019. pii: **S0735-6757**(19): p. 30250-5.  
12  
13 48. Braddick, L., et al., *A mixed-methods study of barriers and facilitators to the implementation of*  
14 *postpartum hemorrhage guidelines in Uganda*. Int J Gynecol Obstet, 2016. **132**(1): p. 89-93.  
15  
16 49. Morris, J.L. and S. Khatun, *Clinical guidelines-the challenges and opportunities: What we have*  
17 *learned from the case of misoprostol for postpartum hemorrhage*. Int J Gynecol Obstet, 2019.  
18 **144**(1): p. 122-127.  
19  
20 50. Gallos, I.D., et al., *Which drug is best for reducing excessive blood loss after birth*. Cochrane  
21 Database Syst Rev, 2018(4).  
22  
23  
24  
25  
26  
27  
28  
29  
30  
31  
32  
33  
34  
35  
36  
37  
38  
39  
40  
41  
42  
43  
44  
45  
46  
47  
48  
49  
50  
51  
52  
53  
54  
55  
56  
57  
58  
59  
60

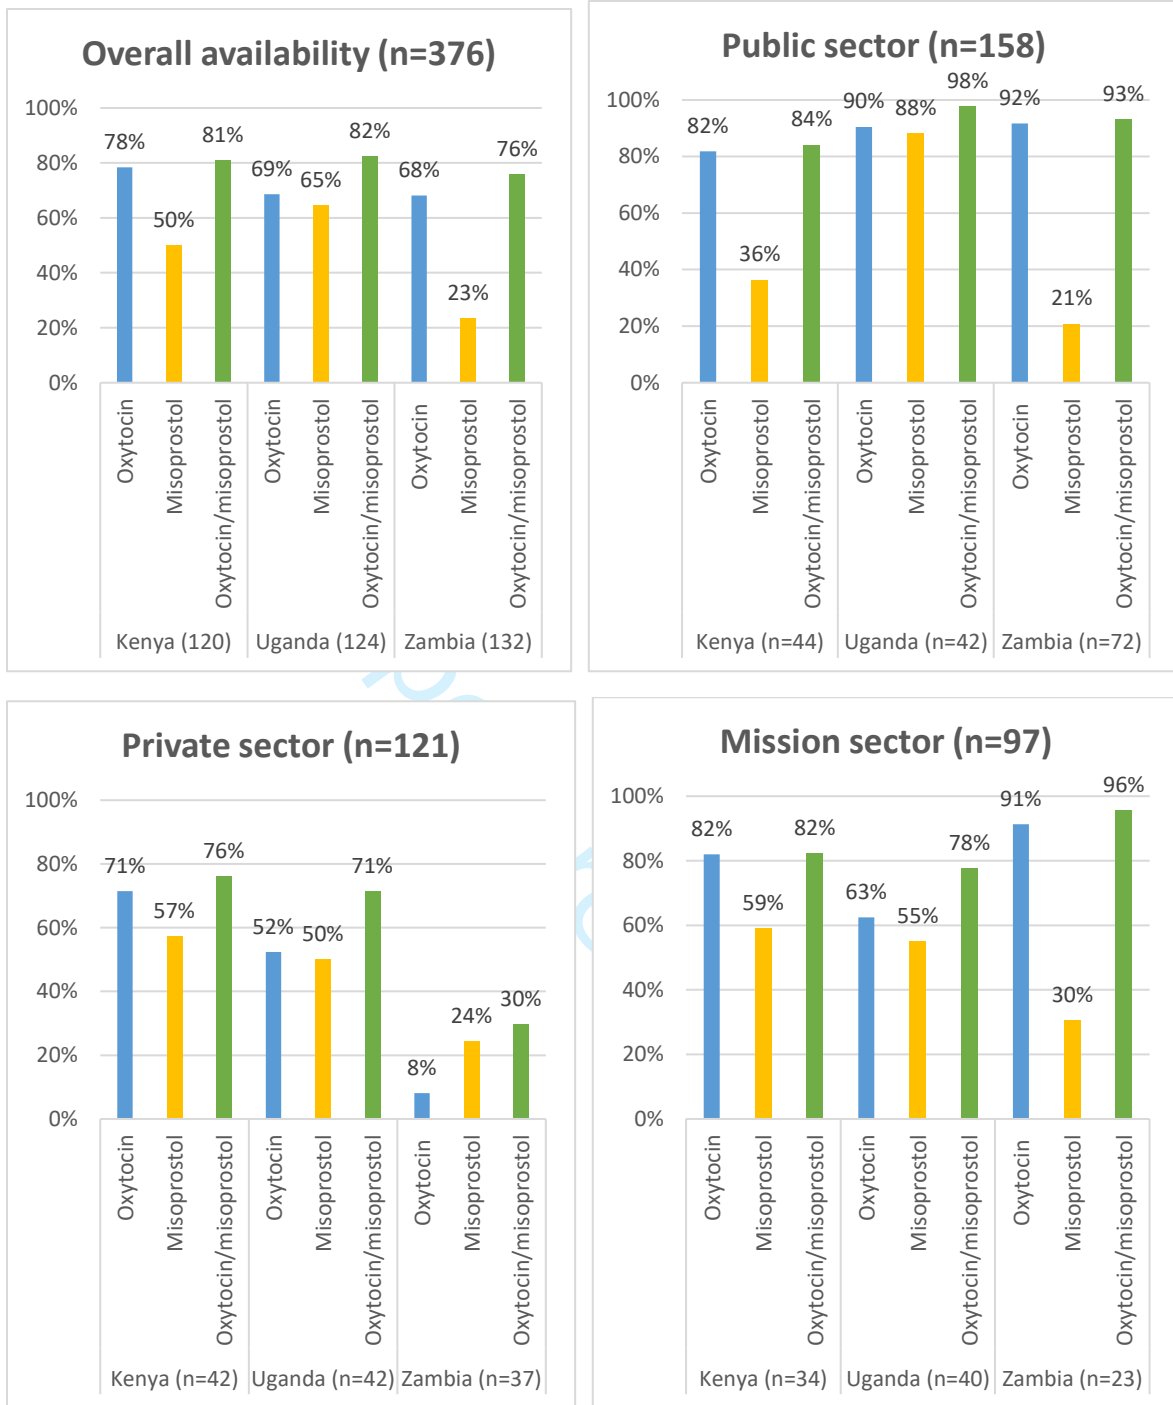

**Fig 1: Availability of oxytocin and misoprostol across sectors in Kenya, Uganda and Zambia**

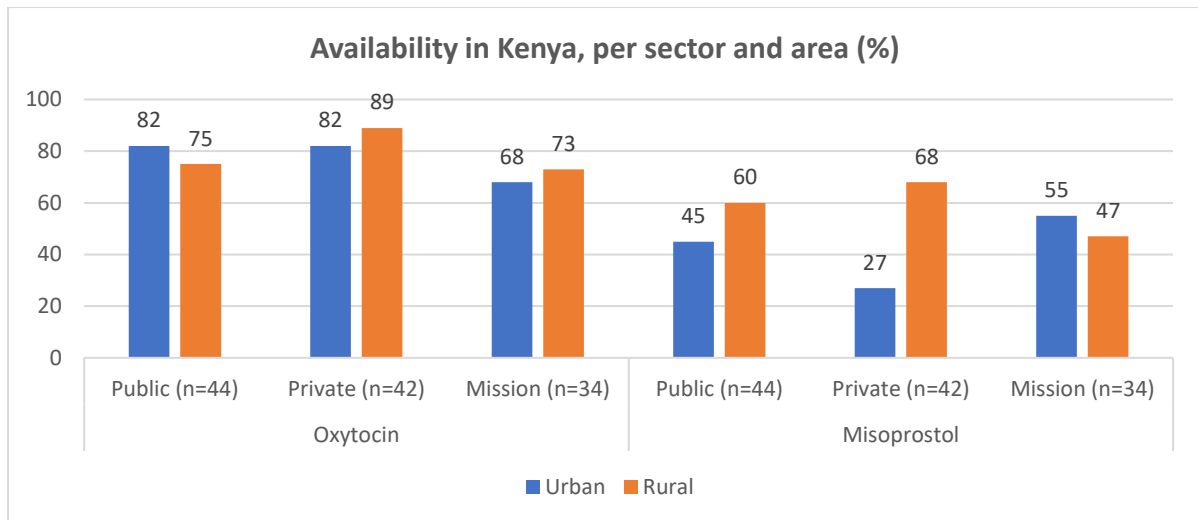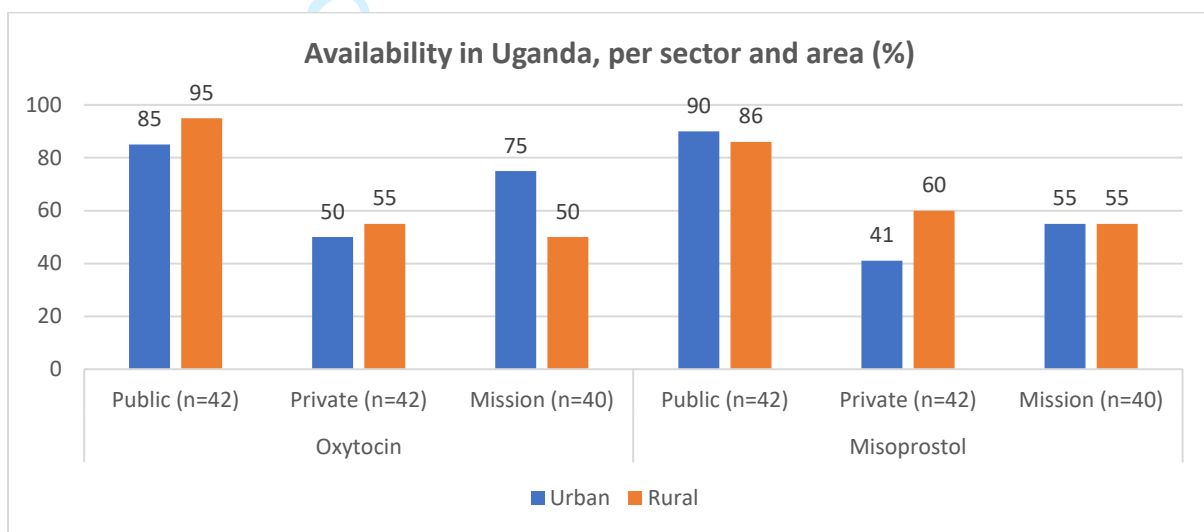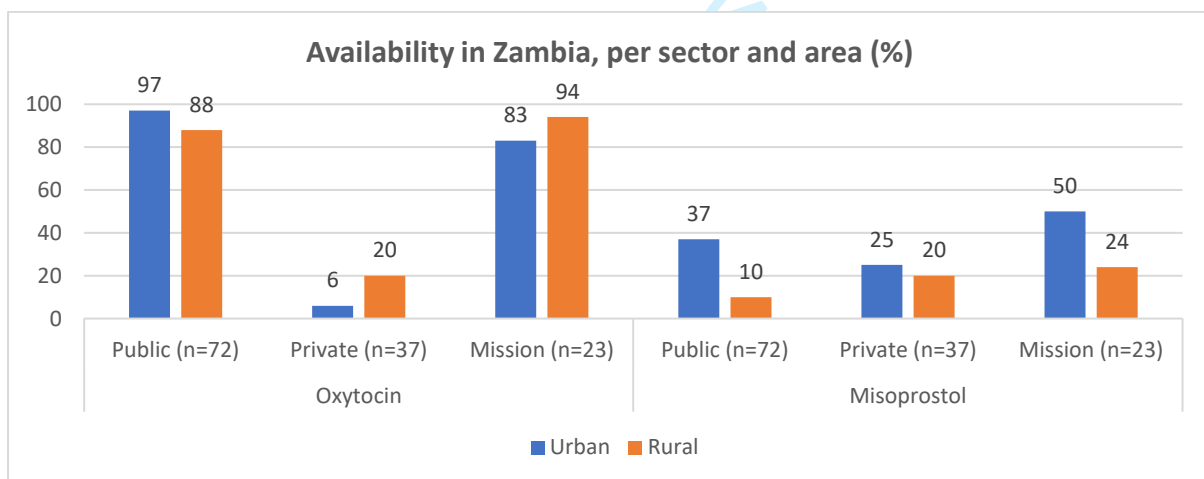

Figure 2: Availability of oxytocin and misoprostol in urban and rural facilities across countries

STROBE Statement—Checklist of items that should be included in reports of *cross-sectional studies*

|                              | Item No | Available | Recommendation                                                                                                                                                                                    | Page No. |
|------------------------------|---------|-----------|---------------------------------------------------------------------------------------------------------------------------------------------------------------------------------------------------|----------|
| <b>Title and abstract</b>    | 1       | Yes       | (a) Indicate the study's design with a commonly used term in the title or the abstract                                                                                                            | 1        |
|                              |         |           | (b) Provide in the abstract is an informative and balanced summary of what was done and what was found                                                                                            | 2        |
| <b>Introduction</b>          |         |           |                                                                                                                                                                                                   |          |
| Background/rationale         | 2       | Yes       | Explain the scientific background and rationale for the investigation being reported                                                                                                              | 5-7      |
| Objectives                   | 3       | Yes       | State specific objectives, including any prespecified hypotheses                                                                                                                                  | 7        |
| <b>Methods</b>               |         |           |                                                                                                                                                                                                   |          |
| Study design                 | 4       | Yes       | Present key elements of study design early in the paper                                                                                                                                           | 7        |
| Setting                      | 5       | Yes       | Describe the setting, locations, and relevant dates, including periods of recruitment, exposure, follow-up, and data collection                                                                   | 8        |
| Participants                 | 6       | Yes       | (a) Give the eligibility criteria, and the sources and methods of selection of participants                                                                                                       | 8        |
| Variables                    | 7       | Yes       | Clearly define all outcomes, exposures, predictors, potential confounders, and effect modifiers. Give diagnostic criteria, if applicable                                                          | 9        |
| Data sources/<br>measurement | 8*      | Yes       | For each variable of interest, give sources of data and details of methods of assessment (measurement). Describe comparability of assessment methods if there is more than one group              | 8-9      |
| Bias                         | 9       | N/A       | Describe any efforts to address potential sources of bias                                                                                                                                         | N/A      |
| Study size                   | 10      | Yes       | Explain how the study size was arrived at                                                                                                                                                         | 8        |
| Quantitative variables       | 11      | Yes       | Explain how quantitative variables were handled in the analyses. If applicable, describe which groupings were chosen and why                                                                      | 9-10     |
| Statistical methods          | 12      | N/A       | (a) Describe all statistical methods, including those used to control for confounding                                                                                                             | -        |
|                              |         |           | (b) Describe any methods used to examine subgroups and interactions                                                                                                                               |          |
|                              |         |           | (c) Explain how missing data were addressed                                                                                                                                                       |          |
|                              |         |           | (d) If applicable, describe analytical methods taking account of sampling strategy                                                                                                                |          |
|                              |         |           | (e) Describe any sensitivity analyses                                                                                                                                                             |          |
| <b>Results</b>               |         |           |                                                                                                                                                                                                   |          |
| Participants                 | 13*     | N/A       | (a) Report numbers of individuals at each stage of study—eg numbers potentially eligible, examined for eligibility, confirmed eligible, included in the study, completing follow-up, and analysed | -        |
|                              |         |           | (b) Give reasons for non-participation at each stage                                                                                                                                              |          |
|                              |         |           | (c) Consider use of a flow diagram                                                                                                                                                                |          |
| Descriptive data             | 14*     | Yes       | (a) Give characteristics of study participants (eg demographic, clinical, social) and information on exposures and potential confounders                                                          | 9        |
|                              |         |           | (b) Indicate number of participants with missing data for each                                                                                                                                    | -        |

|                          |     |     | variable of interest                                                                                                                                                                                         |       |
|--------------------------|-----|-----|--------------------------------------------------------------------------------------------------------------------------------------------------------------------------------------------------------------|-------|
| Outcome data             | 15* | Yes | Report numbers of outcome events or summary measures                                                                                                                                                         | 10-13 |
| Main results             | 16  | N/A | (a) Give unadjusted estimates and, if applicable, confounder-adjusted estimates and their precision (eg, 95% confidence interval). Make clear which confounders were adjusted for and why they were included | -     |
|                          |     |     | (b) Report category boundaries when continuous variables were categorized                                                                                                                                    | -     |
|                          |     |     | (c) If relevant, consider translating estimates of relative risk into absolute risk for a meaningful time period                                                                                             | -     |
| Other analyses           | 17  | N/A | Report other analyses done—eg analyses of subgroups and interactions, and sensitivity analyses                                                                                                               | -     |
| <b>Discussion</b>        |     |     |                                                                                                                                                                                                              |       |
| Key results              | 18  | Yes | Summarises key results with reference to study objectives                                                                                                                                                    | 14    |
| Limitations              | 19  | Yes | Discusses limitations of the study, taking into account sources of potential bias or imprecision. Discuss both direction and magnitude of any potential bias                                                 | 16    |
| Interpretation           | 20  | Yes | Give a cautious overall interpretation of results considering objectives, limitations, multiplicity of analyses, results from similar studies, and other relevant evidence                                   | 14-15 |
| Generalisability         | 21  | No  | Discuss the generalisability (external validity) of the study results                                                                                                                                        | -     |
| <b>Other information</b> |     |     |                                                                                                                                                                                                              |       |
| Funding                  | 22  | Yes | Gives the source of funding and the role of the funders for the present study and, if applicable, for the original study on which the present article is based                                               | 18    |

\*Give information separately for exposed and unexposed groups.

N/A- Not applicable

**Note:** An Explanation and Elaboration article discusses each checklist item and gives methodological background and published examples of transparent reporting. The STROBE checklist is best used in conjunction with this article (freely available on the Web sites of PLoS Medicine at <http://www.plosmedicine.org/>, Annals of Internal Medicine at <http://www.annals.org/>, and Epidemiology at <http://www.epidem.com/>). Information on the STROBE Initiative is available at [www.strobe-statement.org](http://www.strobe-statement.org).
